# Supplementary material for: Quassinoids from Twigs of Harrisonia perforata (Blanco) Merr and Their Anti-Parkinson’s Disease Effect
Source: MDPI journal article supplement (doi:10.3390/ijms242216196), 2023-11-11
Supplement: s1 [file s1]

## SUPPORTING INFORMATION

# Quassinoids from Twigs of *Harrisonia Perforata* (Blanco) Merr and Their Anti-Parkinson's Disease Effect

Min Cai <sup>1,2,3,†</sup>, Xiao-Lin Bai <sup>3,4,†</sup>, Hao-Jing Zang <sup>1,2,3</sup>, Xiao-Han Tang <sup>1,2,3</sup>, Ying Yan <sup>1,5</sup>, Jia-Jia Wan <sup>1,3</sup>, Min-You Peng <sup>1,5</sup>, Hong Liang <sup>1,3</sup>, Lin Liu <sup>1,3</sup>, Feng Guo <sup>1,3</sup>, Pei-Ji Zhao <sup>2</sup>, Xun Liao <sup>4,\*</sup>, Ying-Tong Di <sup>1,\*</sup> and Xiao-Jiang Hao <sup>1,5</sup>

<sup>1</sup> State Key Laboratory of Phytochemistry and Plant Resources in West China, Kunming Institute of Botany, Chinese Academy of Sciences, Kunming 650201, China; [caimin@mail.kib.ac.cn](mailto:caimin@mail.kib.ac.cn) (M.C.); [zanghaojing@mail.kib.ac.cn](mailto:zanghaojing@mail.kib.ac.cn) (H.-J.Z.); [tangxh1063@gmail.com](mailto:tangxh1063@gmail.com) (X.-H.T.); [crystal\\_yanying@126.com](mailto:crystal_yanying@126.com) (Y.Y.); [wanjiajia@mail.kib.ac.cn](mailto:wanjiajia@mail.kib.ac.cn) (J.-J.W.); [pmy3419@126.com](mailto:pmy3419@126.com) (M.-Y.P.); [lianghong@mail.kib.ac.cn](mailto:lianghong@mail.kib.ac.cn) (H.L.); [liulin@mail.kib.ac.cn](mailto:liulin@mail.kib.ac.cn) (L.L.); [guofeng@mail.kib.ac.cn](mailto:guofeng@mail.kib.ac.cn) (F.G.); [haoxj@mail.kib.ac.cn](mailto:haoxj@mail.kib.ac.cn) (X.-J.H.)

<sup>2</sup> School of Life Sciences, Yunnan University, Kunming 650091, China; [pjzhao@ynu.edu.cn](mailto:pjzhao@ynu.edu.cn)

<sup>3</sup> University of Chinese Academy of Sciences, Beijing 100049, China; [baixl@cib.ac.cn](mailto:baixl@cib.ac.cn)

<sup>4</sup> Chengdu Institute of Biology, Chinese Academy of Sciences, Chengdu 610041, China

<sup>5</sup> State Key Laboratory of Functions and Applications of Medicinal Plants, College of Pharmacy, Guizhou Provincial Engineering Technology Research Center for Chemical Drug R&D, Guizhou Medical University, Guiyang 550014, China

\* Correspondence: [liaoxtun@cib.amc.cn](mailto:liaoxtun@cib.amc.cn) (X.L.); [diyt@mail.kib.ac.cn](mailto:diyt@mail.kib.ac.cn) (Y.-T.D.); Tel.: +86-28-82890402 (X.L.); +86-871-65223263 (Y.-T.D.)

<sup>†</sup> These authors contributed equally to this work.

## Table of content

|                                                                                                              |    |
|--------------------------------------------------------------------------------------------------------------|----|
| X-ray crystallographic data of Perforalactone L (7).....                                                     | 4  |
| Table S1. Crystal data and structure refinement for 7.....                                                   | 4  |
| Chemical transformation. ....                                                                                | 5  |
| Table S2. reaction condition of Chemical transformation.....                                                 | 6  |
| Figure S1. <sup>1</sup> H NMR spectrum of Perforalactone F (1) in CDCl <sub>3</sub> .....                    | 7  |
| Figure S2. <sup>13</sup> C NMR spectrum of Perforalactone F (1) in CDCl <sub>3</sub> .....                   | 7  |
| Figure S3. <sup>1</sup> H- <sup>1</sup> H COSY spectrum of Perforalactone F (1) in CDCl <sub>3</sub> .....   | 8  |
| Figure S4. HSQC spectrum of Perforalactone F (1) in CDCl <sub>3</sub> . ....                                 | 8  |
| Figure S5. HMBC spectrum of Perforalactone F (1) in CDCl <sub>3</sub> . ....                                 | 9  |
| Figure S6. ROESY spectrum of Perforalactone F (1) in CDCl <sub>3</sub> .....                                 | 9  |
| Figure S7. <sup>1</sup> H NMR spectrum of Perforalactone G (2) in CDCl <sub>3</sub> .....                    | 10 |
| Figure S8. <sup>13</sup> C NMR spectrum of Perforalactone G (2) in CDCl <sub>3</sub> .....                   | 10 |
| Figure S9. <sup>1</sup> H- <sup>1</sup> H COSY spectrum of Perforalactone G (2) in CDCl <sub>3</sub> .....   | 11 |
| Figure S10. HSQC spectrum of Perforalactone G (2) in CDCl <sub>3</sub> .....                                 | 11 |
| Figure S11. HMBC spectrum of Perforalactone G (2) in CDCl <sub>3</sub> .....                                 | 12 |
| Figure S12. ROESY spectrum of Perforalactone G (2) in CDCl <sub>3</sub> . ....                               | 12 |
| Figure S13. <sup>1</sup> H NMR spectrum of Perforalactone H (3) in CDCl <sub>3</sub> . ....                  | 13 |
| Figure S14. <sup>13</sup> C NMR spectrum of Perforalactone H (3) in CDCl <sub>3</sub> .....                  | 13 |
| Figure S15. <sup>1</sup> H- <sup>1</sup> H COSY spectrum of Perforalactone H (3) in CDCl <sub>3</sub> .....  | 14 |
| Figure S16. HSQC spectrum of Perforalactone H (3) in CDCl <sub>3</sub> .....                                 | 14 |
| Figure S17. HMBC spectrum of Perforalactone H (3) in CDCl <sub>3</sub> .....                                 | 15 |
| Figure S18. ROESY spectrum of Perforalactone H (3) in CDCl <sub>3</sub> . ....                               | 15 |
| Figure S19. <sup>1</sup> H NMR spectrum of Perforalactone I (4) in CDCl <sub>3</sub> .....                   | 16 |
| Figure S20. <sup>13</sup> C NMR spectrum of Perforalactone I (4) in CDCl <sub>3</sub> .....                  | 16 |
| Figure S21. <sup>1</sup> H- <sup>1</sup> H COSY spectrum of Perforalactone I (4) in CDCl <sub>3</sub> . .... | 17 |
| Figure S22. HSQC spectrum of Perforalactone I (4) in CDCl <sub>3</sub> . ....                                | 17 |
| Figure S23. HMBC spectrum of Perforalactone I (4) in CDCl <sub>3</sub> . ....                                | 18 |
| Figure S24. ROESY spectrum of Perforalactone I (4) in CDCl <sub>3</sub> .....                                | 18 |
| Figure S25. <sup>1</sup> H NMR spectrum of Perforalactone J (5) in CD <sub>3</sub> OD. ....                  | 19 |
| Figure S26. <sup>13</sup> C NMR spectrum of Perforalactone J (5) in CD <sub>3</sub> OD. ....                 | 19 |
| Figure S27. <sup>1</sup> H- <sup>1</sup> H COSY spectrum of Perforalactone J (5) in CD <sub>3</sub> OD. .... | 20 |

|                                                                                                              |    |
|--------------------------------------------------------------------------------------------------------------|----|
| Figure S28. HSQC spectrum of Perforalactone J (5) in CD <sub>3</sub> OD.....                                 | 20 |
| Figure S29. HMBC spectrum of Perforalactone J (5) in CD <sub>3</sub> OD.....                                 | 21 |
| Figure S30. ROESY spectrum of Perforalactone J (5) in CD <sub>3</sub> OD. ....                               | 21 |
| Figure S31. <sup>1</sup> H NMR spectrum of Perforalactone K (6) in CDCl <sub>3</sub> . ....                  | 22 |
| Figure S32. <sup>13</sup> C NMR spectrum of Perforalactone K (6) in CDCl <sub>3</sub> . ....                 | 22 |
| Figure S33. <sup>1</sup> H- <sup>1</sup> H COSY spectrum of Perforalactone K (6) in CDCl <sub>3</sub> . .... | 23 |
| Figure S34. HSQC spectrum of Perforalactone K (6) in CDCl <sub>3</sub> . ....                                | 23 |
| Figure S35. HMBC spectrum of Perforalactone K (6) in CDCl <sub>3</sub> . ....                                | 24 |
| Figure S36. ROESY spectrum of Perforalactone K (6) in CDCl <sub>3</sub> . ....                               | 24 |
| Figure S37. <sup>1</sup> H NMR spectrum of Perforalactone L (7) in CDCl <sub>3</sub> . ....                  | 25 |
| Figure S38. <sup>13</sup> C NMR spectrum of Perforalactone L (7) in CDCl <sub>3</sub> . ....                 | 25 |
| Figure S39. <sup>1</sup> H- <sup>1</sup> H COSY spectrum of Perforalactone L (7) in CDCl <sub>3</sub> . .... | 26 |
| Figure S40. HSQC spectrum of Perforalactone L (7) in CDCl <sub>3</sub> . ....                                | 26 |
| Figure S41. HMBC spectrum of Perforalactone L (7) in CDCl <sub>3</sub> . ....                                | 27 |
| Figure S42. ROESY spectrum of Perforalactone L (7) in CDCl <sub>3</sub> . ....                               | 27 |

## X-ray crystallographic data of Perforalactone **7**

Single-crystals of compound **7** was obtained from CH<sub>3</sub>OH/H<sub>2</sub>O (10:1) at room temperature.

Crystal data for compound **7**: C<sub>19</sub>H<sub>22</sub>O<sub>5</sub>, M = 330.36, a = 9.5789(4) Å, b = 12.0883(5) Å, c = 14.0568(6) Å,  $\alpha = 90^\circ$ ,  $\beta = 90^\circ$ ,  $\gamma = 90^\circ$ , V = 1627.67(12) Å<sup>3</sup>, T = 150.(2) K, space group P2<sub>1</sub>2<sub>1</sub>2<sub>1</sub>, Z = 4,  $\mu(\text{Cu K}\alpha) = 0.797 \text{ mm}^{-1}$ , 13248 reflections measured, 3082 independent reflections (R<sub>int</sub> = 0.0639). The final R1 values were 0.0298 (I > 2 $\sigma$ (I)). The final wR(F2) values were 0.0751 (I > 2 $\sigma$ (I)). The final R1 values were 0.0322 (all data). The final wR(F2) values were 0.0763 (all data). The goodness of fit on F2 was 1.036. Flack parameter = 0.04(8).

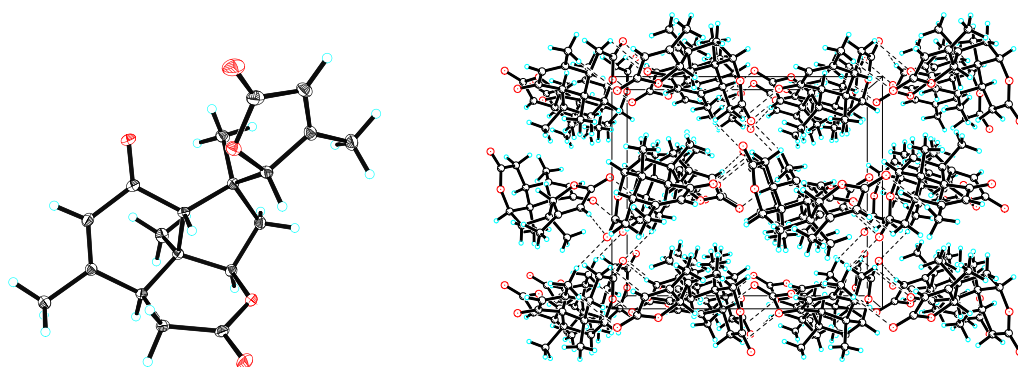

Single-crystal X-ray structure of **7**

**Table S1. Crystal data and structure refinement for **7**.**

|                     |                                                |
|---------------------|------------------------------------------------|
| Identification code | global                                         |
| Empirical formula   | C <sub>19</sub> H <sub>22</sub> O <sub>5</sub> |
| Formula weight      | 330.36                                         |
| Temperature         | 150(2) K                                       |
| Wavelength          | 1.54178 Å                                      |
| Crystal system      | Orthorhombic                                   |
| Space group         | P2 <sub>1</sub> 2 <sub>1</sub> 2 <sub>1</sub>  |

|                                   |                                                         |                                  |
|-----------------------------------|---------------------------------------------------------|----------------------------------|
| Unit cell dimensions              | a = 9.5789(4) Å<br>b = 12.0883(5) Å<br>c = 14.0568(6) Å | a = 90°.<br>b = 90°.<br>g = 90°. |
| Volume                            | 1627.67(12) Å <sup>3</sup>                              |                                  |
| Z                                 | 4                                                       |                                  |
| Density (calculated)              | 1.348 Mg/m <sup>3</sup>                                 |                                  |
| Absorption coefficient            | 0.797 mm <sup>-1</sup>                                  |                                  |
| F(000)                            | 704                                                     |                                  |
| Crystal size                      | 0.630 x 0.400 x 0.020 mm <sup>3</sup>                   |                                  |
| Theta range for data collection   | 4.83 to 70.22°.                                         |                                  |
| Index ranges                      | -11<=h<=11, -14<=k<=14, -17<=l<=15                      |                                  |
| Reflections collected             | 13248                                                   |                                  |
| Independent reflections           | 3082 [R(int) = 0.0639]                                  |                                  |
| Completeness to theta = 70.22°    | 99.7 %                                                  |                                  |
| Absorption correction             | Semi-empirical from equivalents                         |                                  |
| Max. and min. transmission        | 0.98 and 0.70                                           |                                  |
| Refinement method                 | Full-matrix least-squares on F <sup>2</sup>             |                                  |
| Data / restraints / parameters    | 3082 / 0 / 221                                          |                                  |
| Goodness-of-fit on F <sup>2</sup> | 1.036                                                   |                                  |
| Final R indices [I>2sigma(I)]     | R1 = 0.0298, wR2 = 0.0751                               |                                  |
| R indices (all data)              | R1 = 0.0322, wR2 = 0.0763                               |                                  |
| Absolute structure parameter      | 0.04(8)                                                 |                                  |
| Largest diff. peak and hole       | 0.209 and -0.158 e.Å <sup>-3</sup>                      |                                  |

---

### Chemical transformation.

Compound **8** was obtained by oxidative conversion of natural product Perforalactone B via Bayer-Weilig.

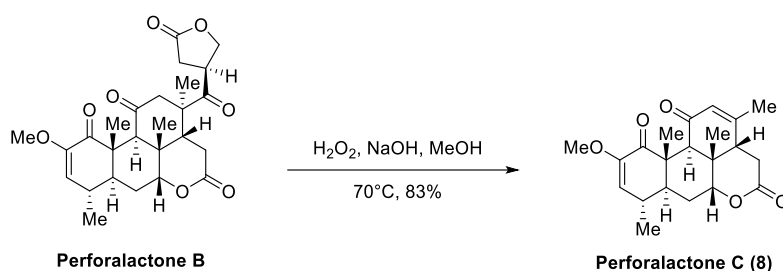

Yield 83%. To a solution of Perforalactone B (1) (20 mg, 42.32  $\mu\text{mol}$ ) in Chromatographic methanol was (20 ml) added  $\text{H}_2\text{O}_2$ (30%, 10 mml, 95.65  $\mu\text{mol}$ ) at that temperature, After being warmed to 60°C,  $\text{NaOH(aq)}$  (2.50 mol/L, 136  $\mu\text{ml}$ , 36.40  $\mu\text{mol}$ ) was added. After stirring for 30 min at 70 °C, the reaction mixture was quenched with sat.  $\text{Na}_2\text{S}_2\text{O}_4$ , and extracted with EtOAc. The organic phase was washed with brine, dried over  $\text{Na}_2\text{SO}_4$  filtered, and evaporated to dryness *in vacuo*. The crude product was purified by silica gel column chromatography to afford Compound **8**.

Of course, a number of reaction conditions were screened in order to successfully realize this chemical transformation.

**Table S2. reaction condition of Chemical transformation.**

| Entry | reagent/equiv                                                | temp  | yield  |
|-------|--------------------------------------------------------------|-------|--------|
| 1     | $\text{K}_2\text{CO}_3$ /1 equiv                             | r.t.  | no rxn |
| 2     | $\text{K}_2\text{CO}_3$ /over equiv                          | r.t.  | no rxn |
| 3     | $\text{K}_2\text{CO}_3$ /1 equiv                             | 50°C  | no rxn |
| 4     | $\text{K}_2\text{CO}_3$ , $\text{O}_2$ /1 equiv              | r.t.  | no rxn |
| 5     | $\text{NaOH}$ /1 equiv                                       | r.t.  | no rxn |
| 6     | $\text{K}_2\text{CO}_3$ /1 equiv+3-Chlorobenzoic acid/1equiv | r.t.  | no rxn |
| 7     | $\text{NaOH}$ /0.86 equiv+ $\text{H}_2\text{O}_2$ /2.5       | 70 °C | no rxn |

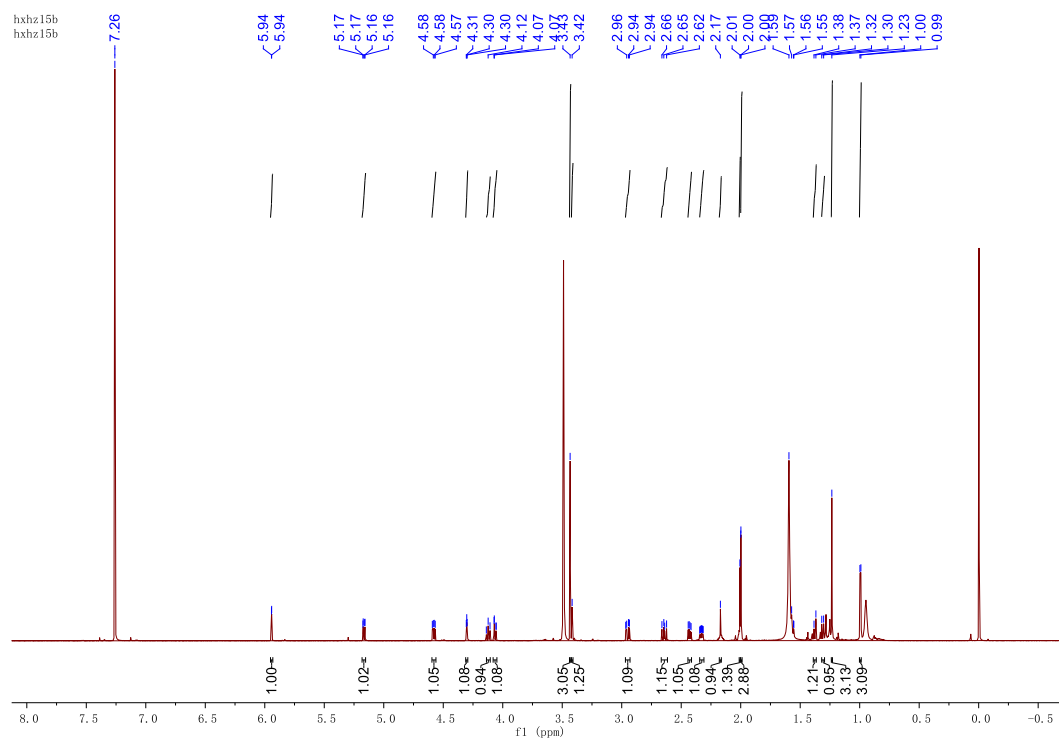

**Figure S1.  $^1\text{H}$  NMR spectrum of Perforalactone F (1) in  $\text{CDCl}_3$ .**

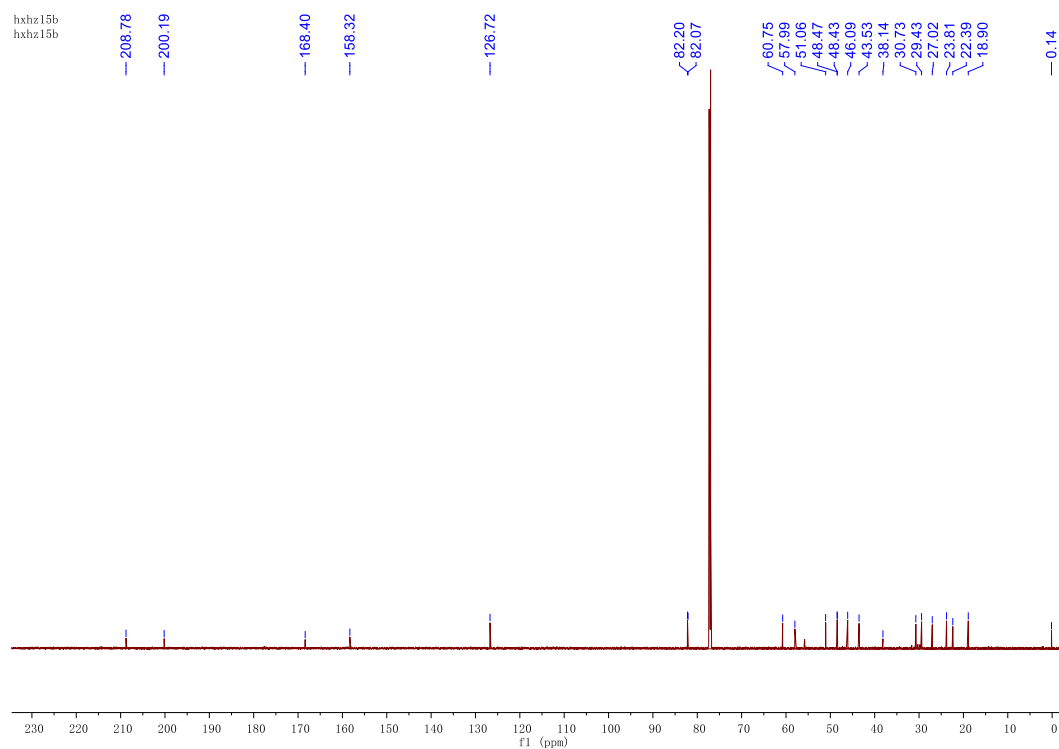

**Figure S2.  $^{13}\text{C}$  NMR spectrum of Perforalactone F (1) in  $\text{CDCl}_3$ .**

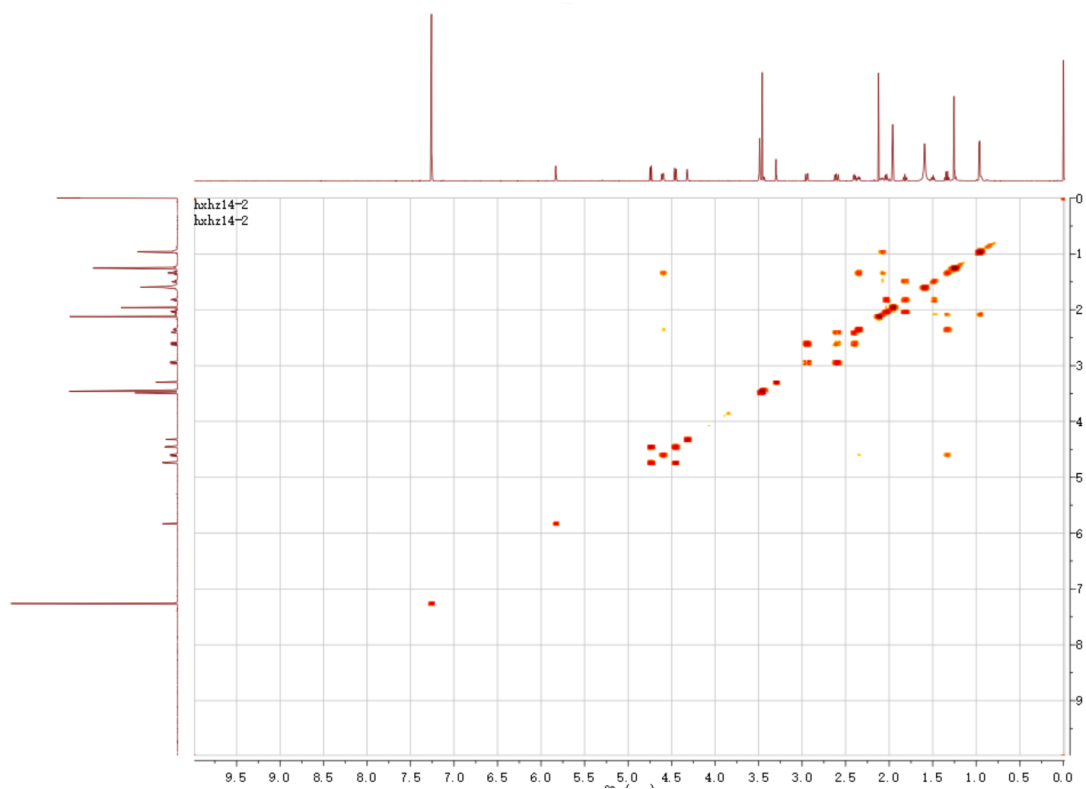

**Figure S3.**  $^1\text{H}$ - $^1\text{H}$  COSY spectrum of Perforalactone F (1) in  $\text{CDCl}_3$

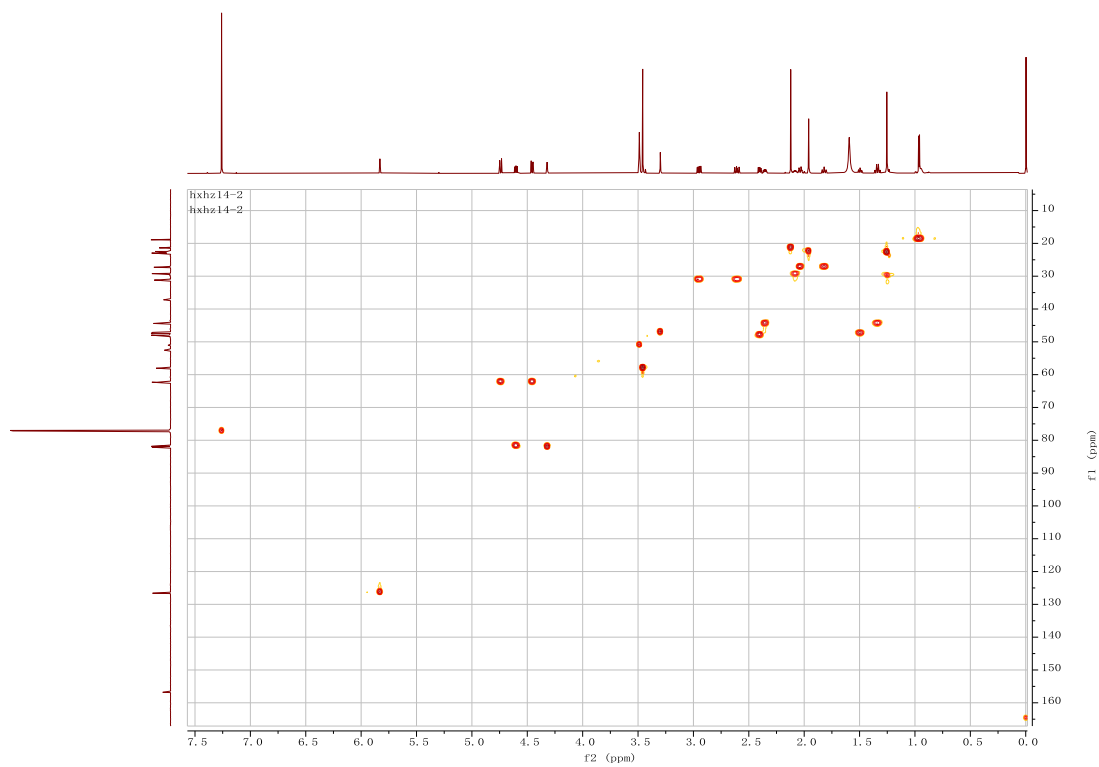

**Figure S4.** HSQC spectrum of Perforalactone F (1) in  $\text{CDCl}_3$ .

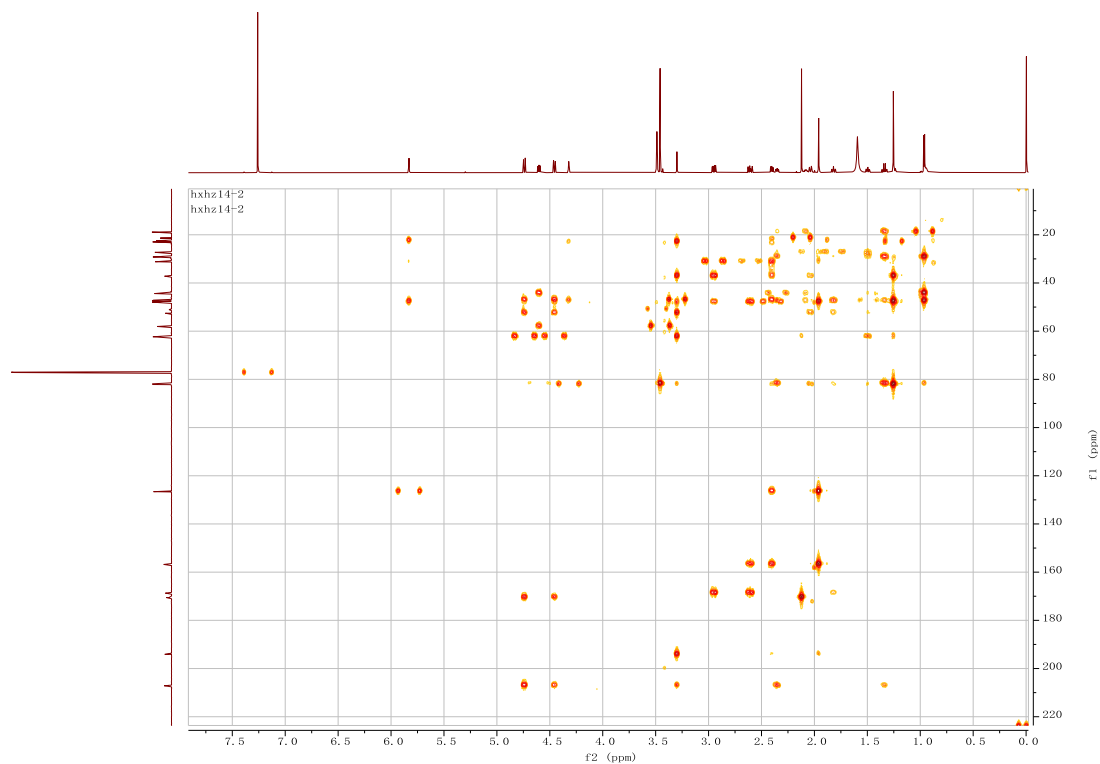

**Figure S5. HMBC spectrum of Perforalactone F (1) in CDCl<sub>3</sub>.**

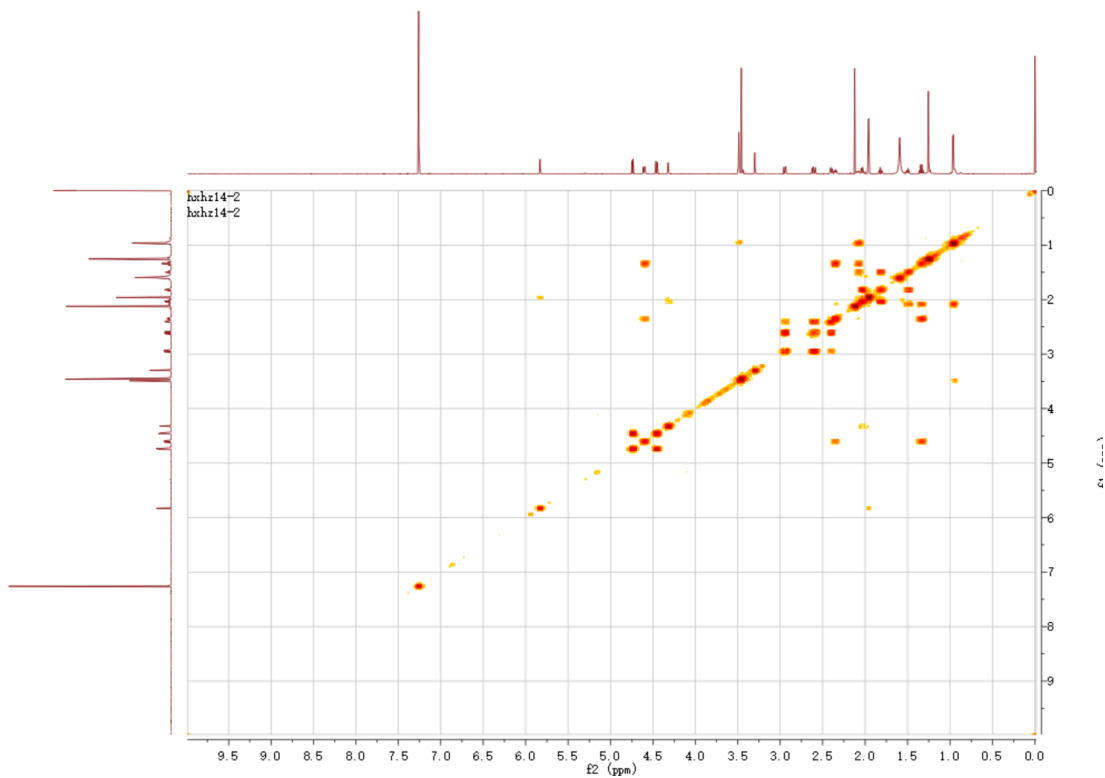

**Figure S6. ROESY spectrum of Perforalactone F (1) in CDCl<sub>3</sub>.**

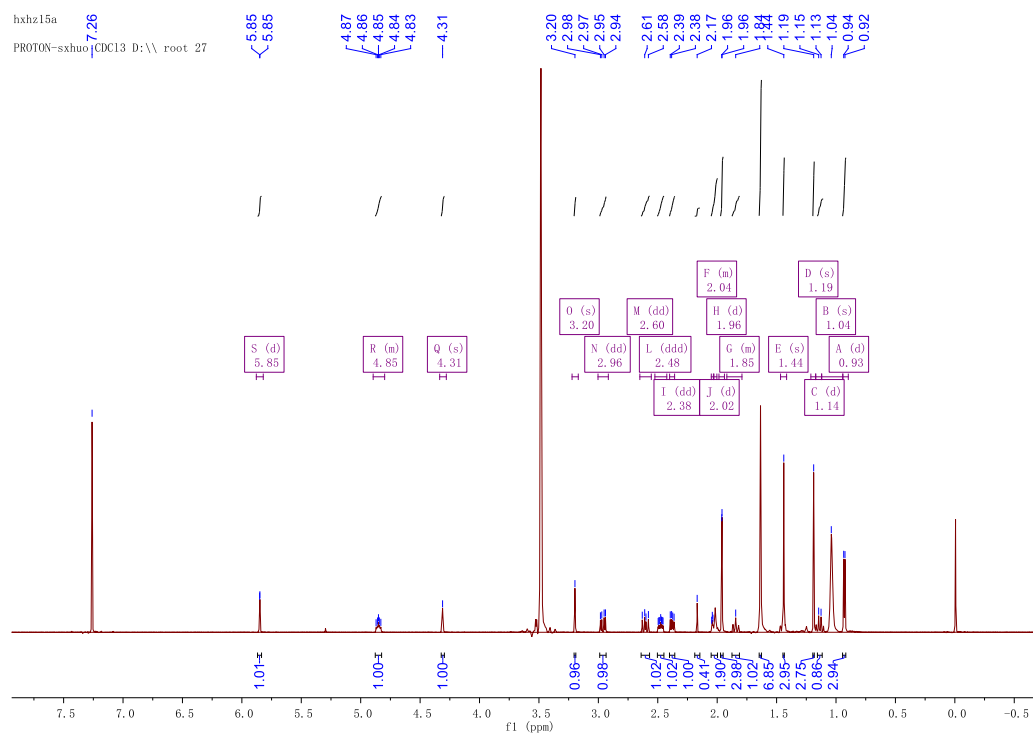

**Figure S7.  $^1\text{H}$  NMR spectrum of Perforalactone G (2) in  $\text{CDCl}_3$ .**

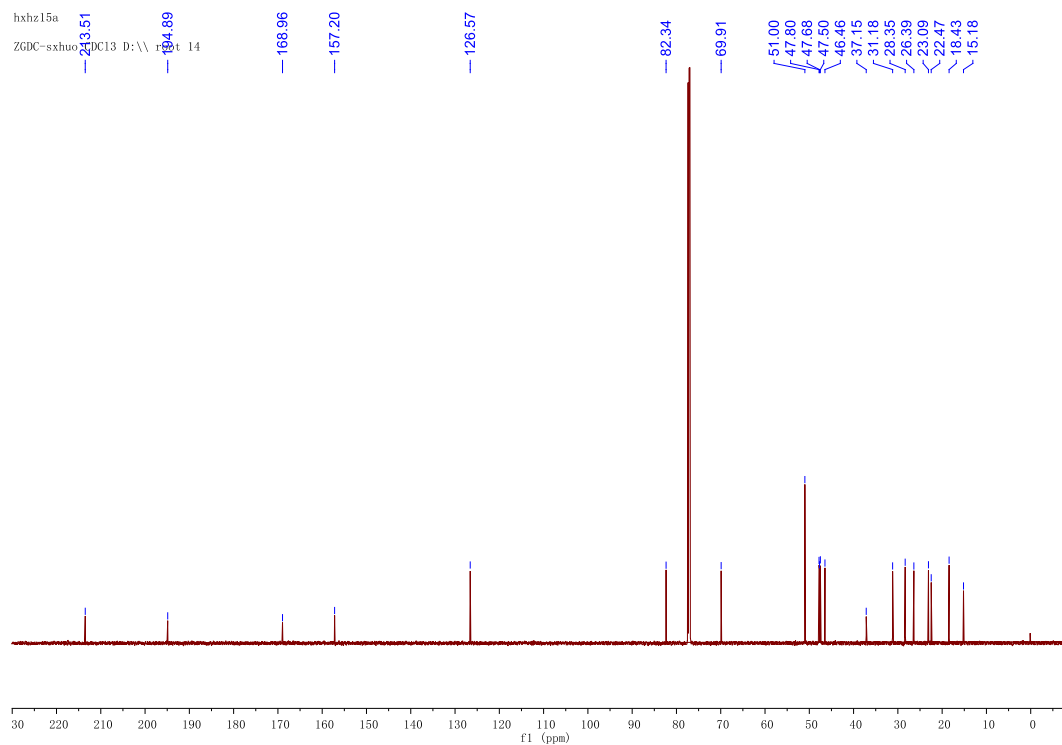

**Figure S8.  $^{13}\text{C}$  NMR spectrum of Perforalactone G (2) in  $\text{CDCl}_3$ .**

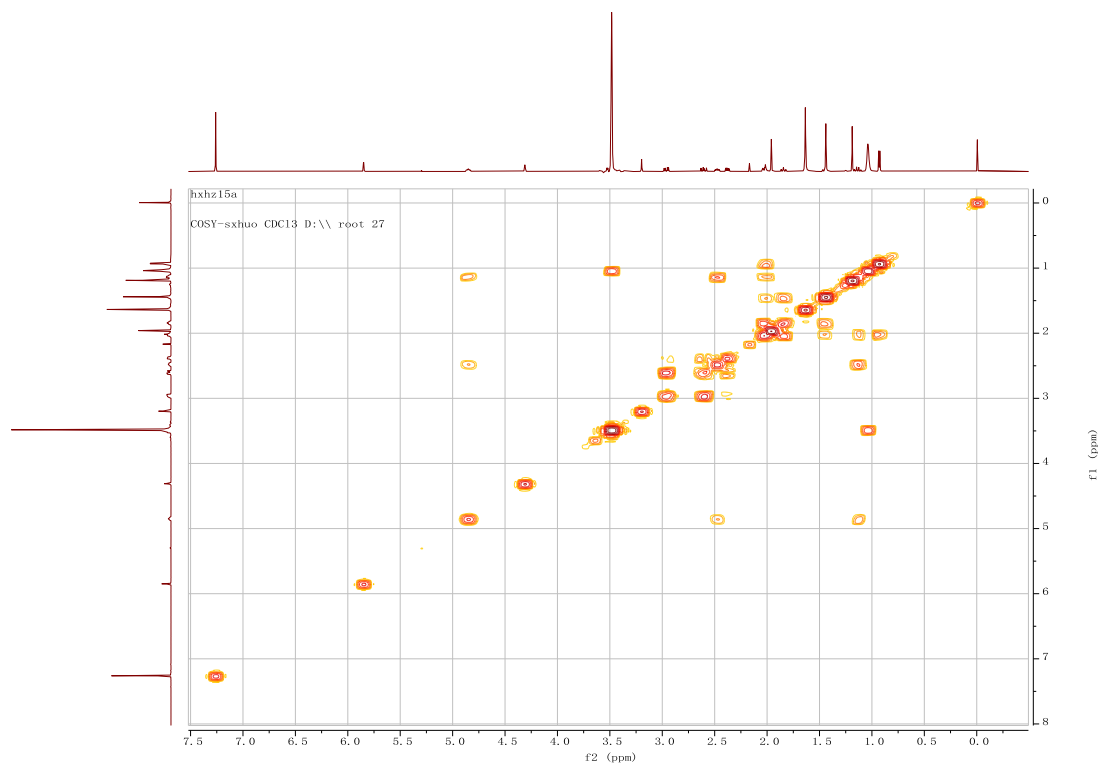

**Figure S9.**  $^1\text{H}$ - $^1\text{H}$  COSY spectrum of Perforalactone G (2) in  $\text{CDCl}_3$ .

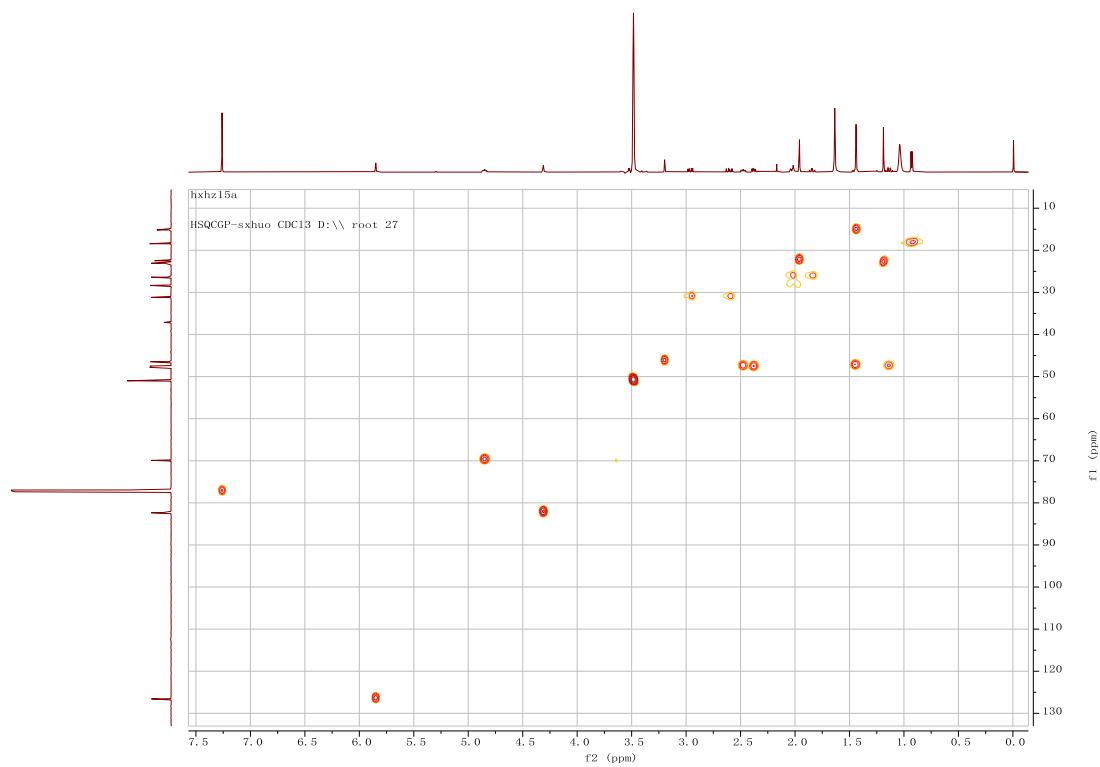

**Figure S10.** HSQC spectrum of Perforalactone G (2) in  $\text{CDCl}_3$ .

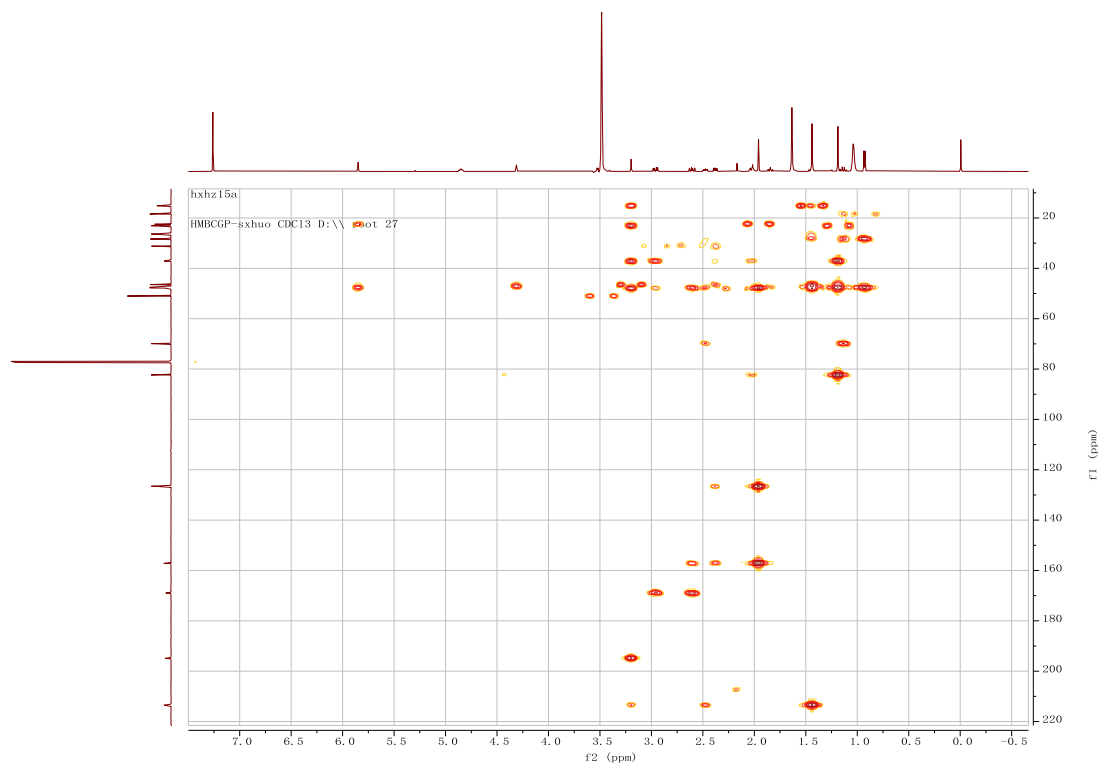

**Figure S11. HMBC spectrum of Perforalactone G (2) in CDCl<sub>3</sub>.**

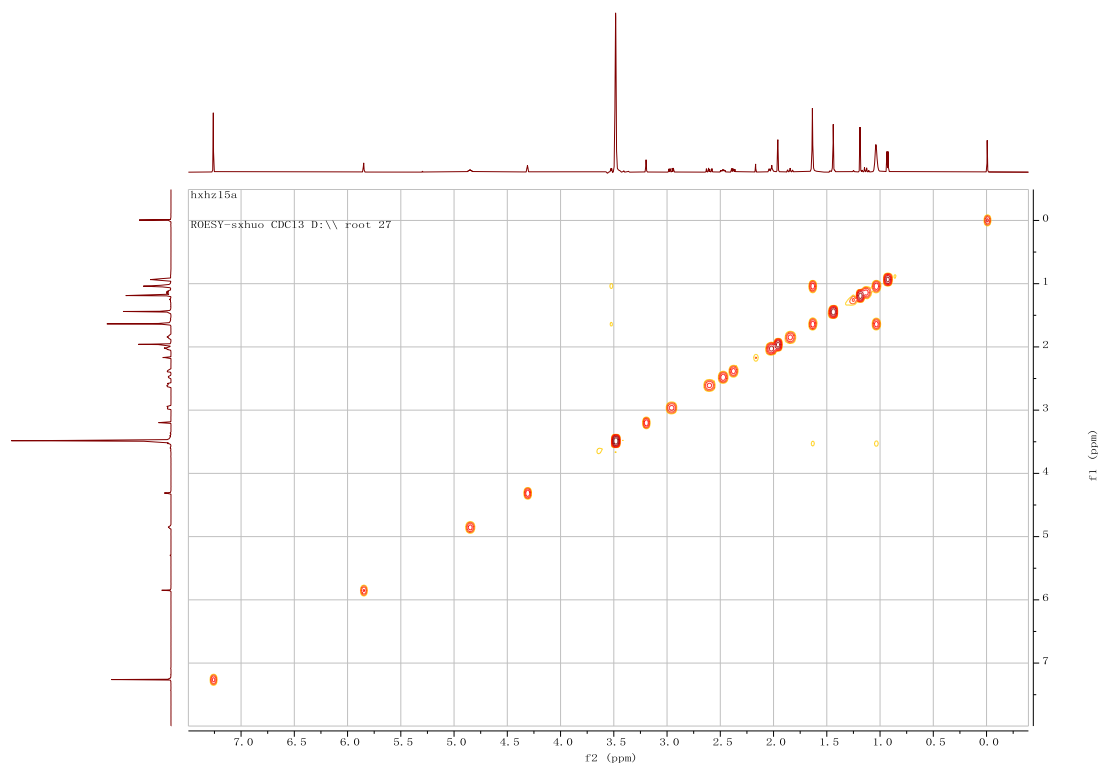

**Figure S12. ROESY spectrum of Perforalactone G (2) in CDCl<sub>3</sub>.**

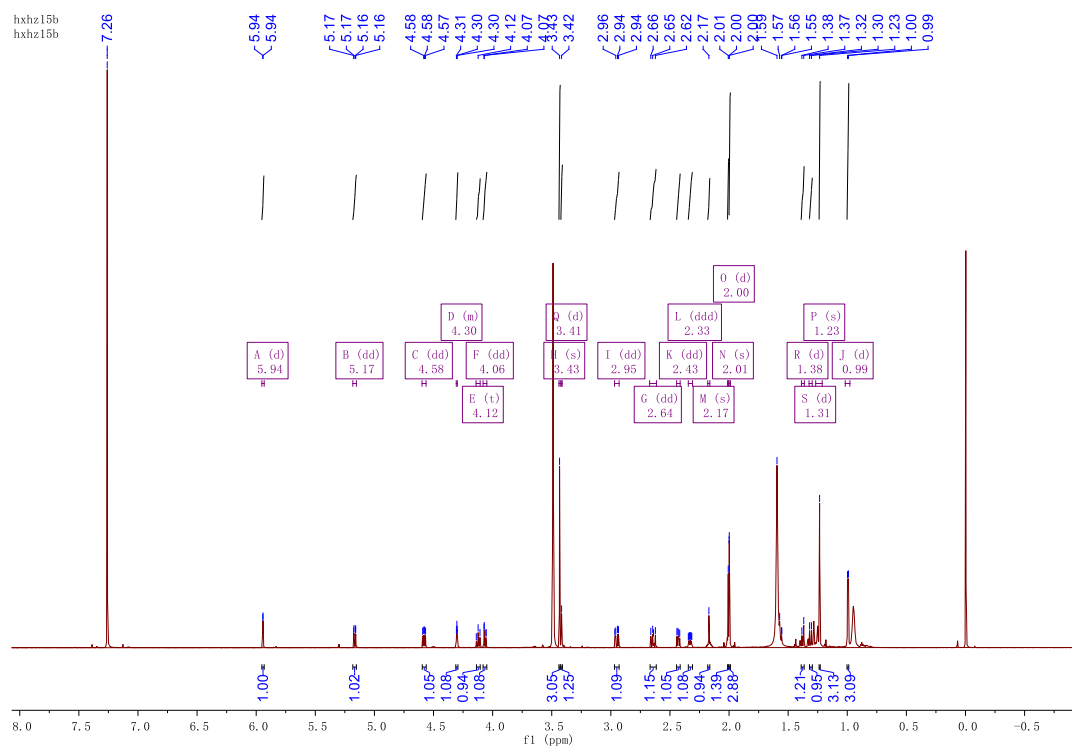

**Figure S13.  $^1\text{H}$  NMR spectrum of Perforalactone H (3) in  $\text{CDCl}_3$ .**

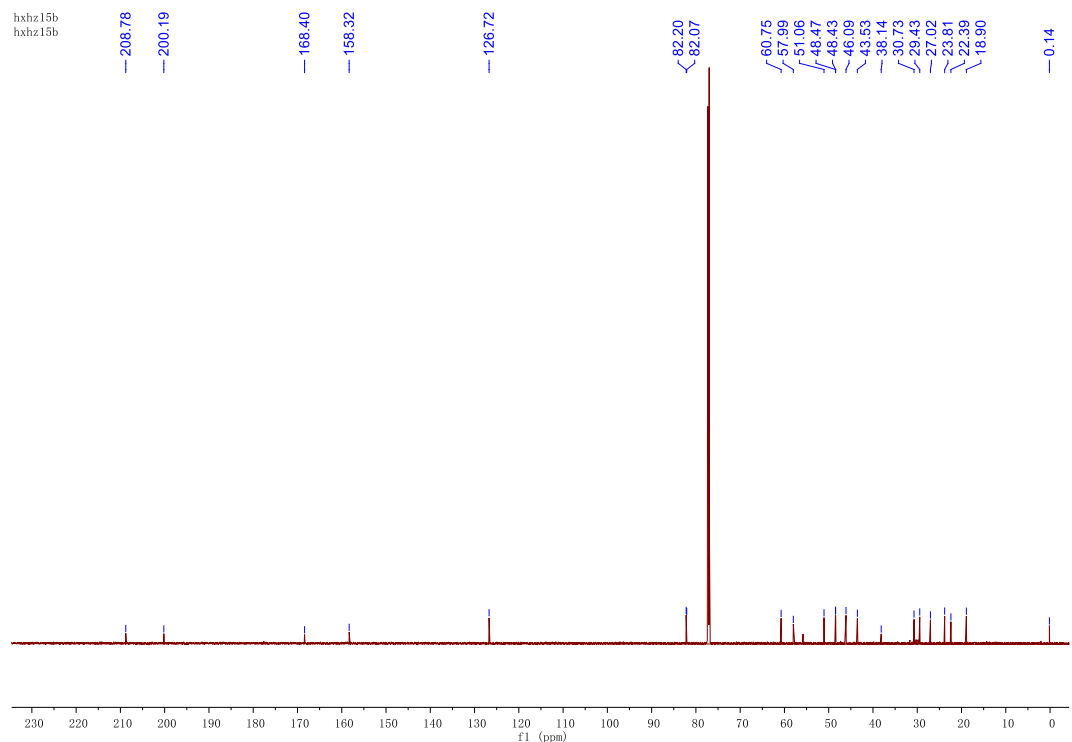

**Figure S14.  $^{13}\text{C}$  NMR spectrum of Perforalactone H (3) in  $\text{CDCl}_3$ .**

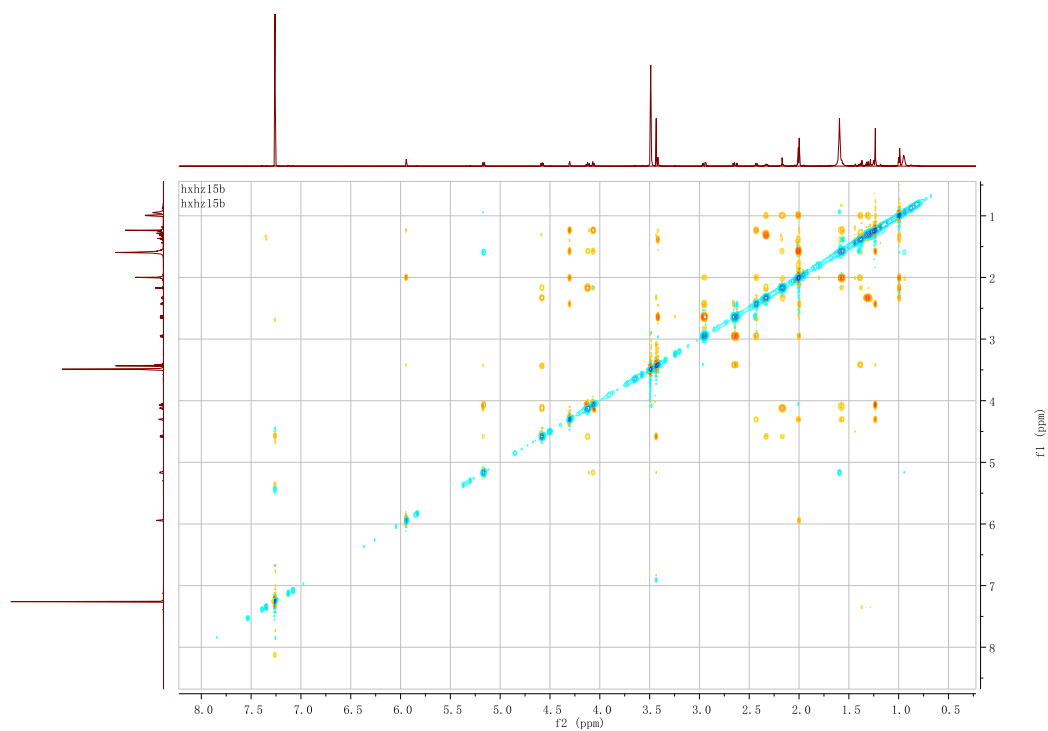

**Figure S15.  $^1\text{H}$ - $^1\text{H}$  COSY spectrum of Perforalactone H (3) in  $\text{CDCl}_3$ .**

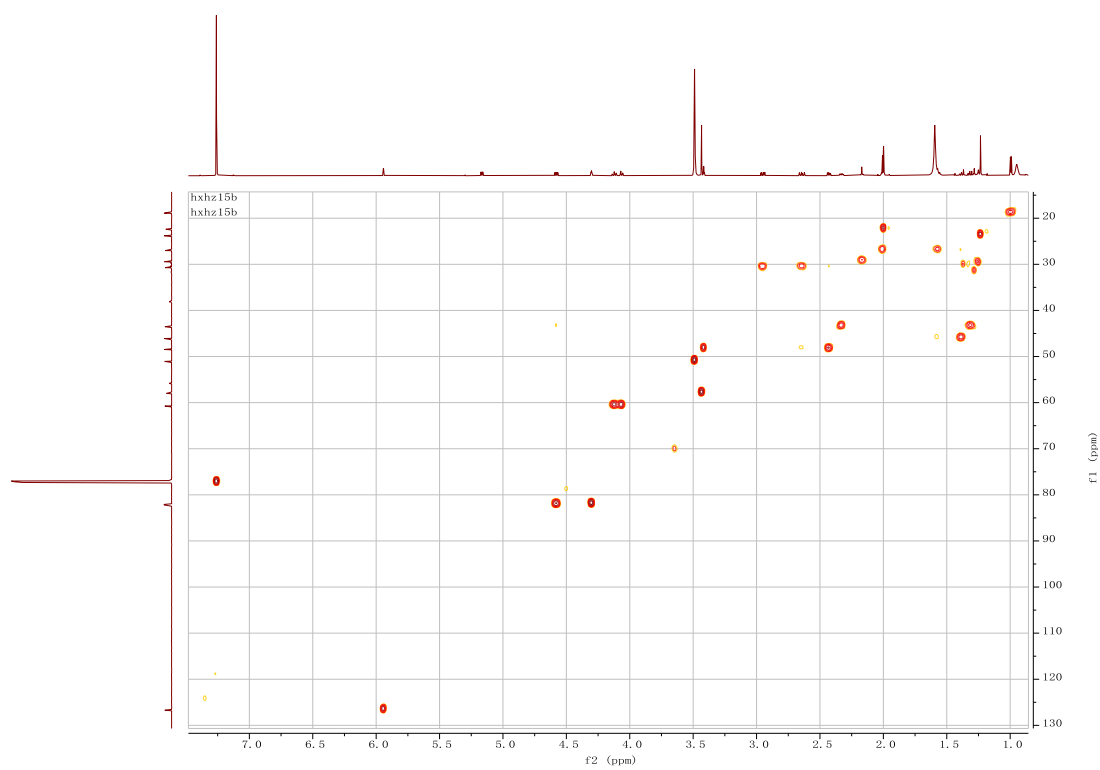

**Figure S16. HSQC spectrum of Perforalactone H (3) in  $\text{CDCl}_3$ .**

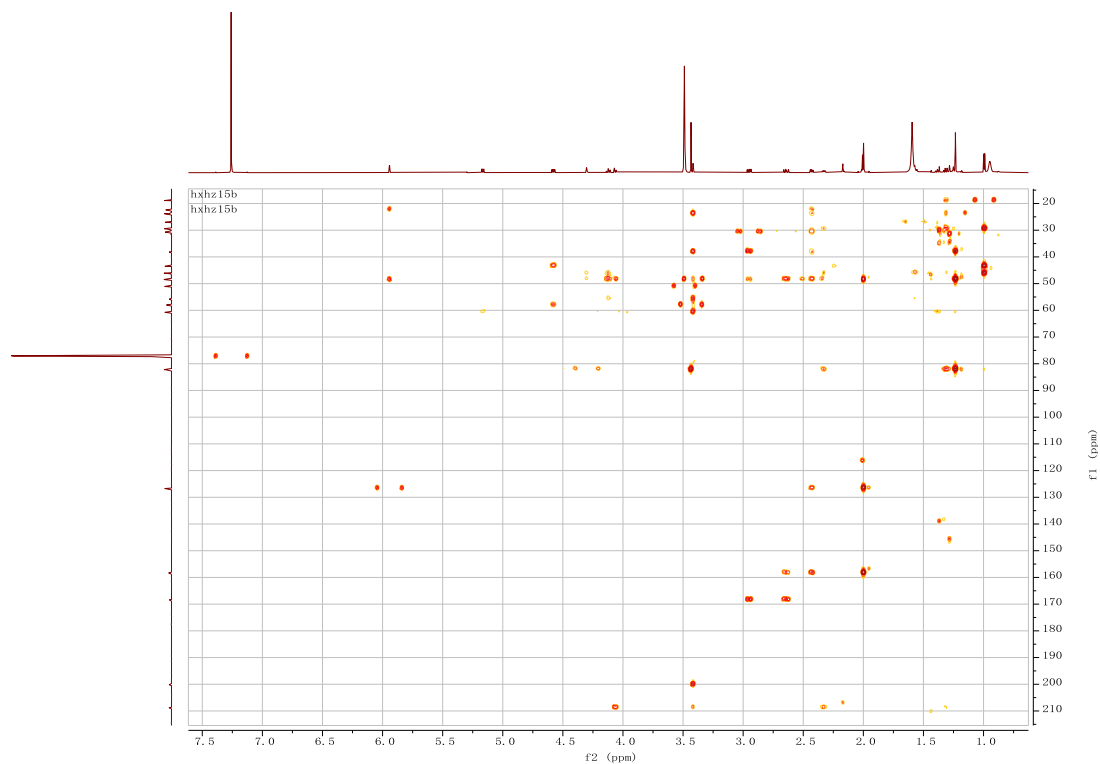

**Figure S17. HMBC spectrum of Perforalactone H (3) in CDCl<sub>3</sub>.**

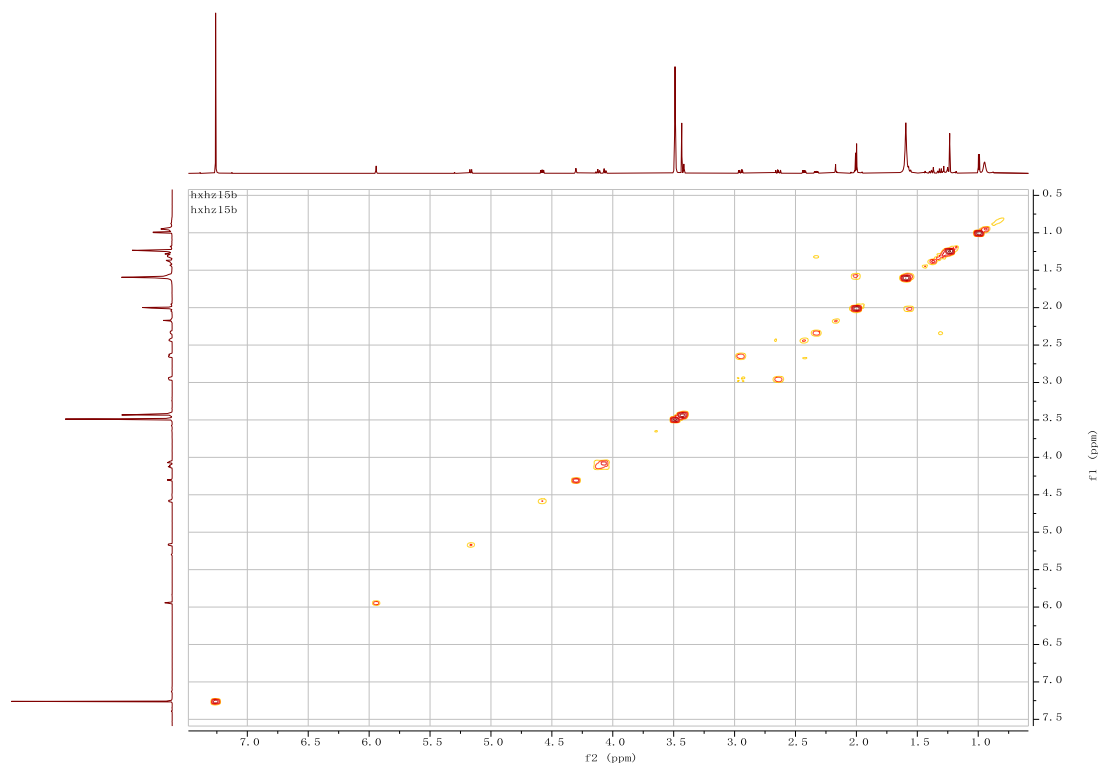

**Figure S18. ROESY spectrum of Perforalactone H (3) in CDCl<sub>3</sub>.**

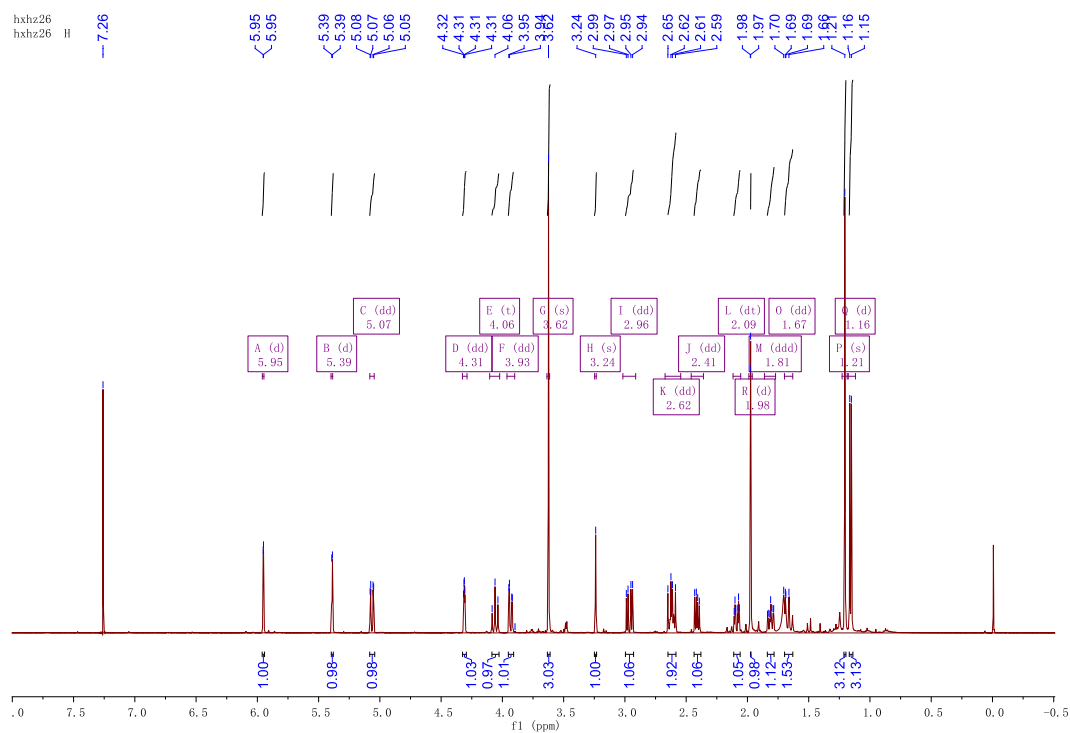

**Figure S19.  $^1\text{H}$  NMR spectrum of Perforalactone I (4) in  $\text{CDCl}_3$ .**

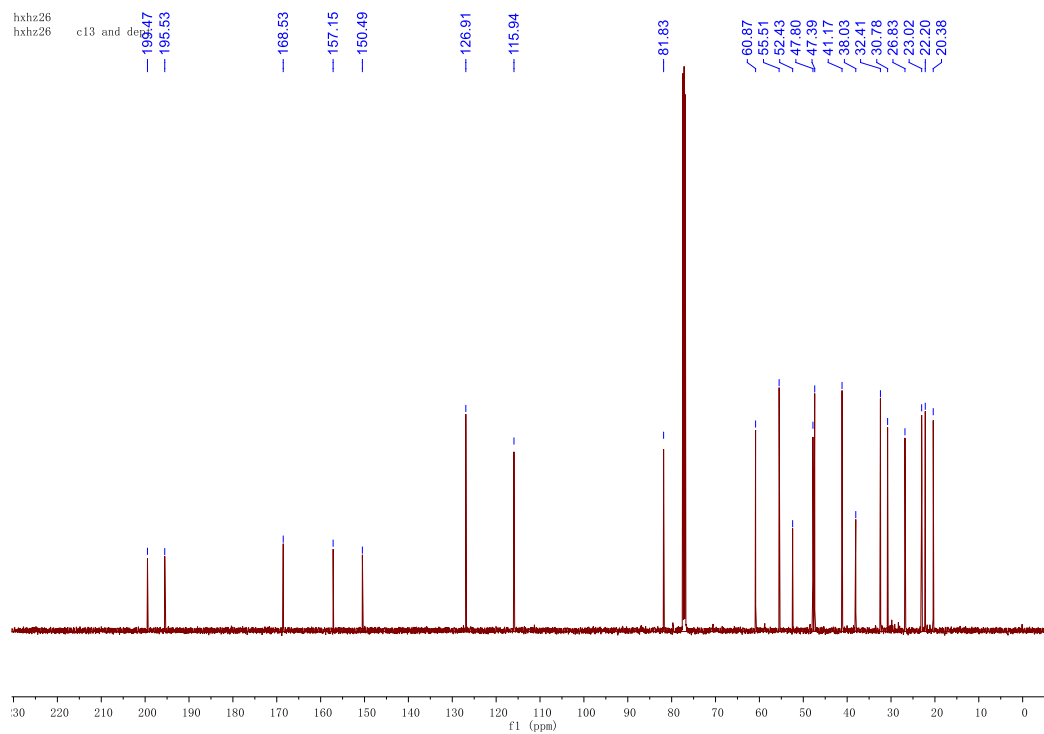

**Figure S20.  $^{13}\text{C}$  NMR spectrum of Perforalactone I (4) in  $\text{CDCl}_3$ .**

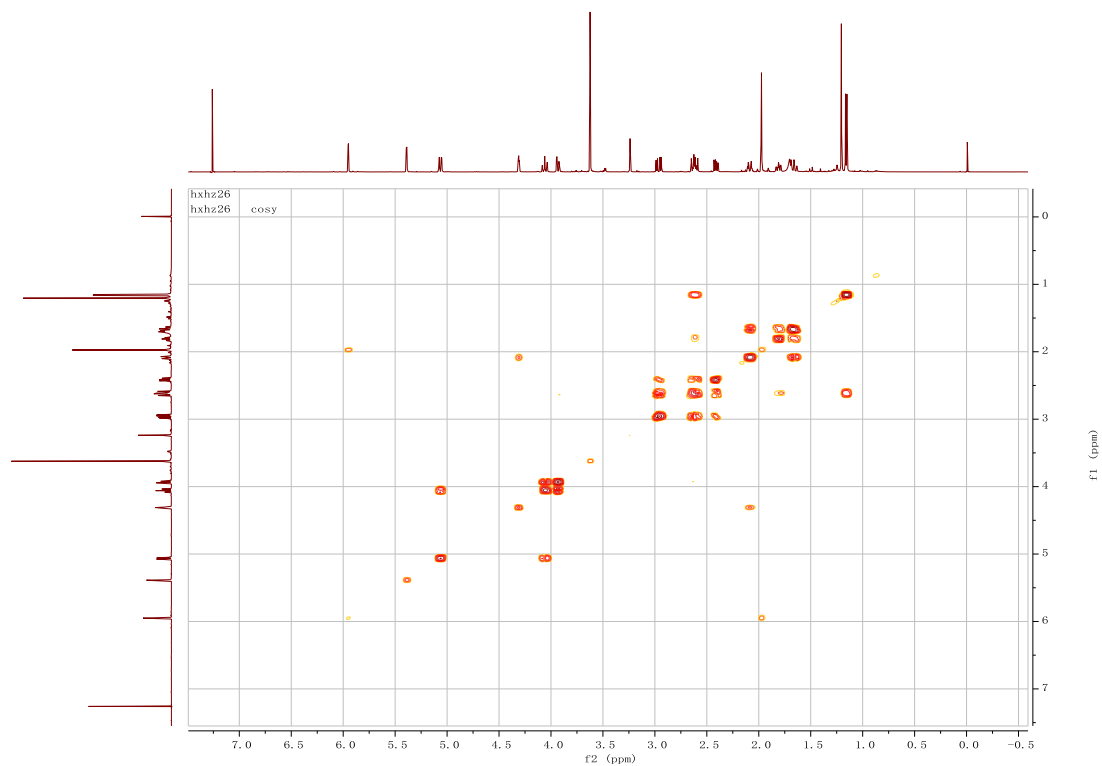

**Figure S21.**  $^1\text{H}$ - $^1\text{H}$  COSY spectrum of Perforalactone I (4) in  $\text{CDCl}_3$ .

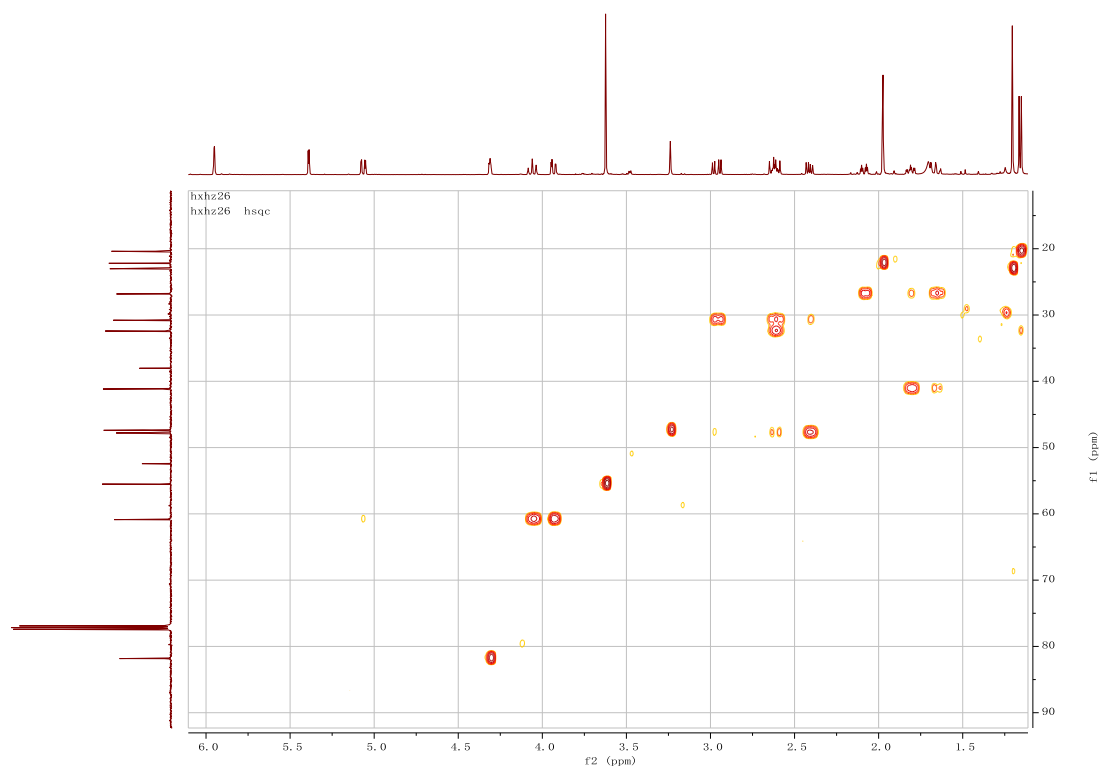

**Figure S22.** HSQC spectrum of Perforalactone I (4) in  $\text{CDCl}_3$ .

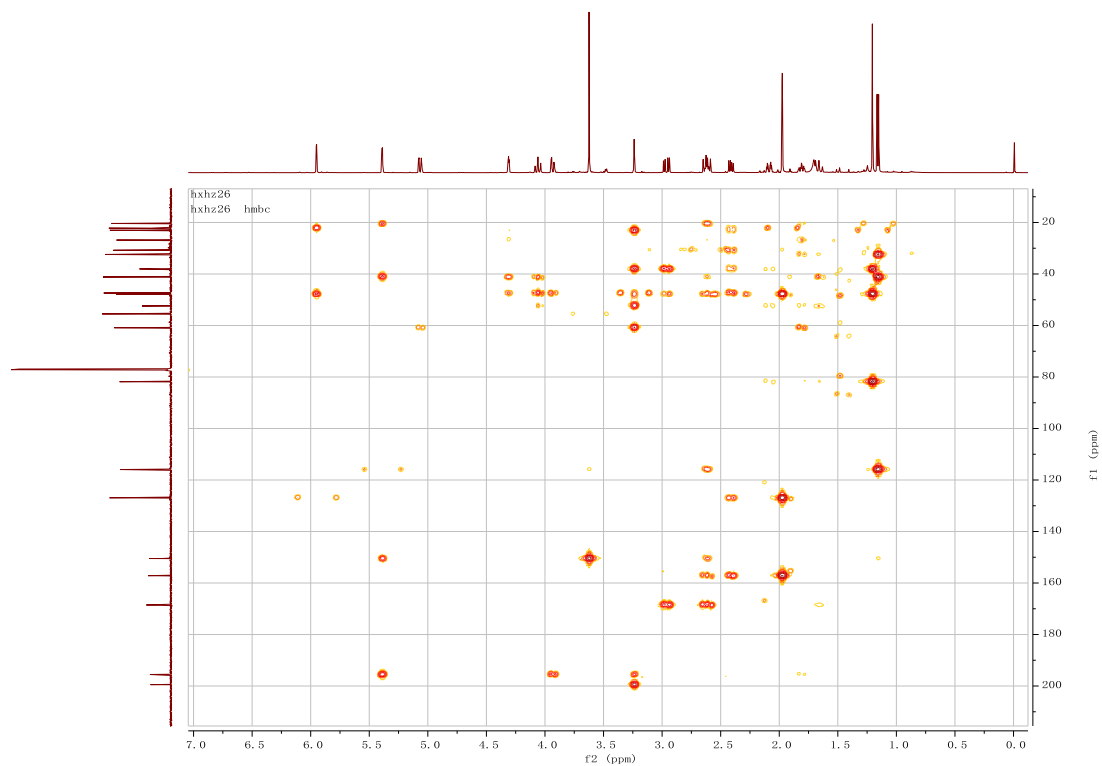

**Figure S23. HMBC spectrum of Perforalactone I (4) in CDCl<sub>3</sub>.**

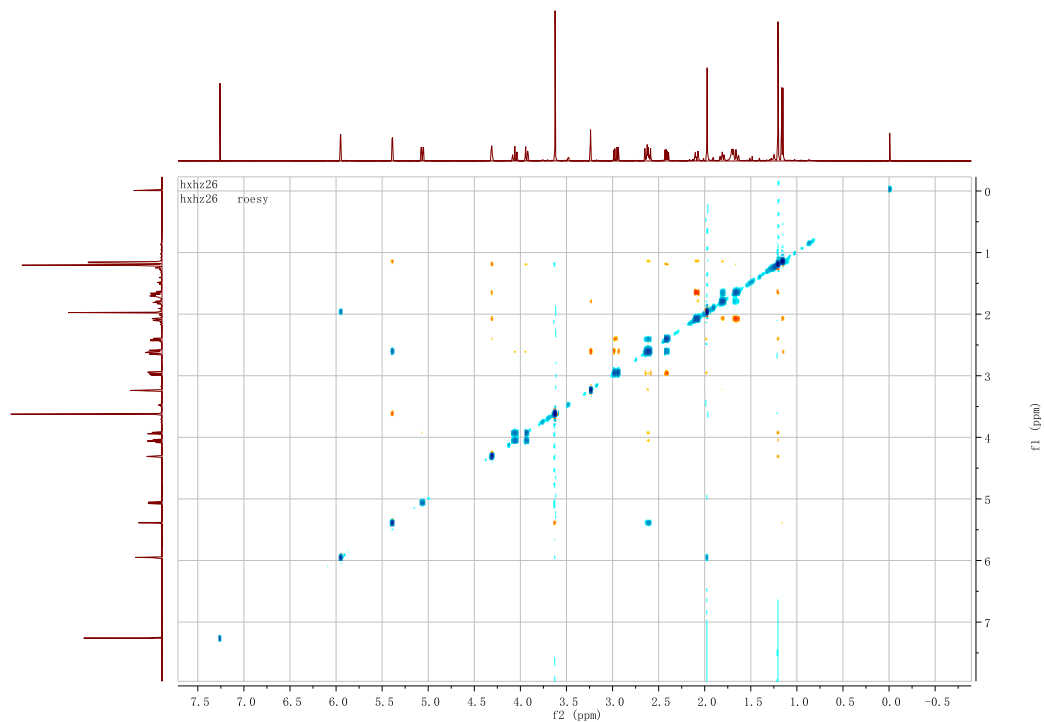

**Figure S24. ROESY spectrum of Perforalactone I (4) in CDCl<sub>3</sub>.**

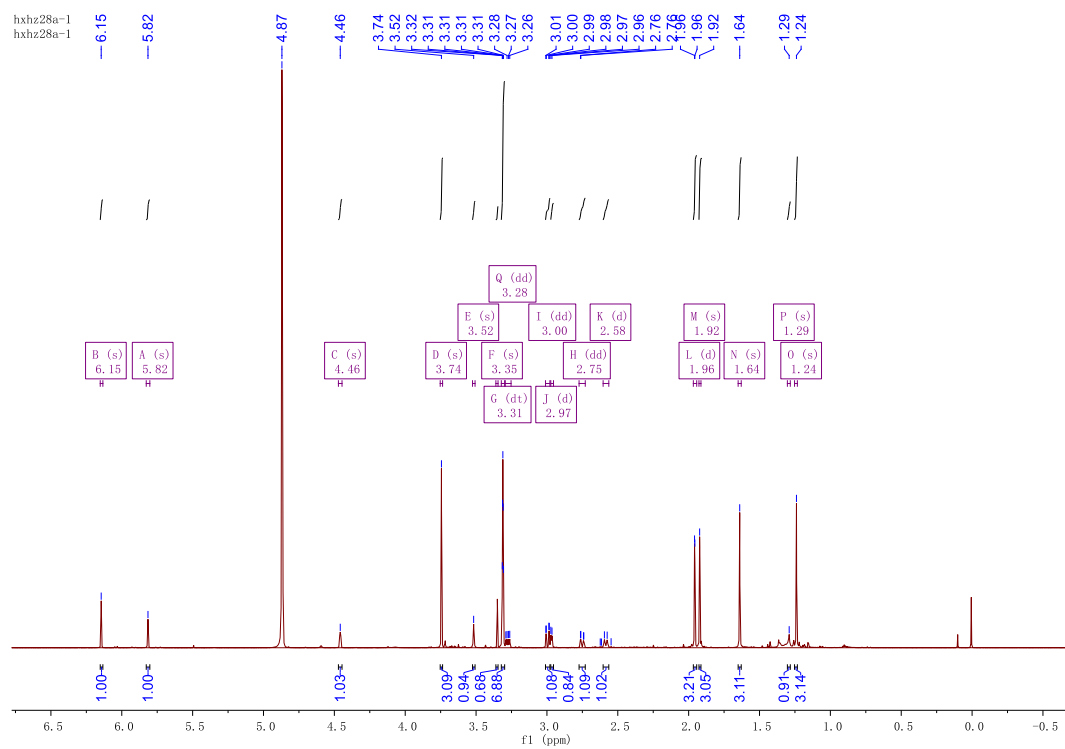

**Figure S25.  $^1\text{H}$  NMR spectrum of Perforalactone J (5) in  $\text{CD}_3\text{OD}$ .**

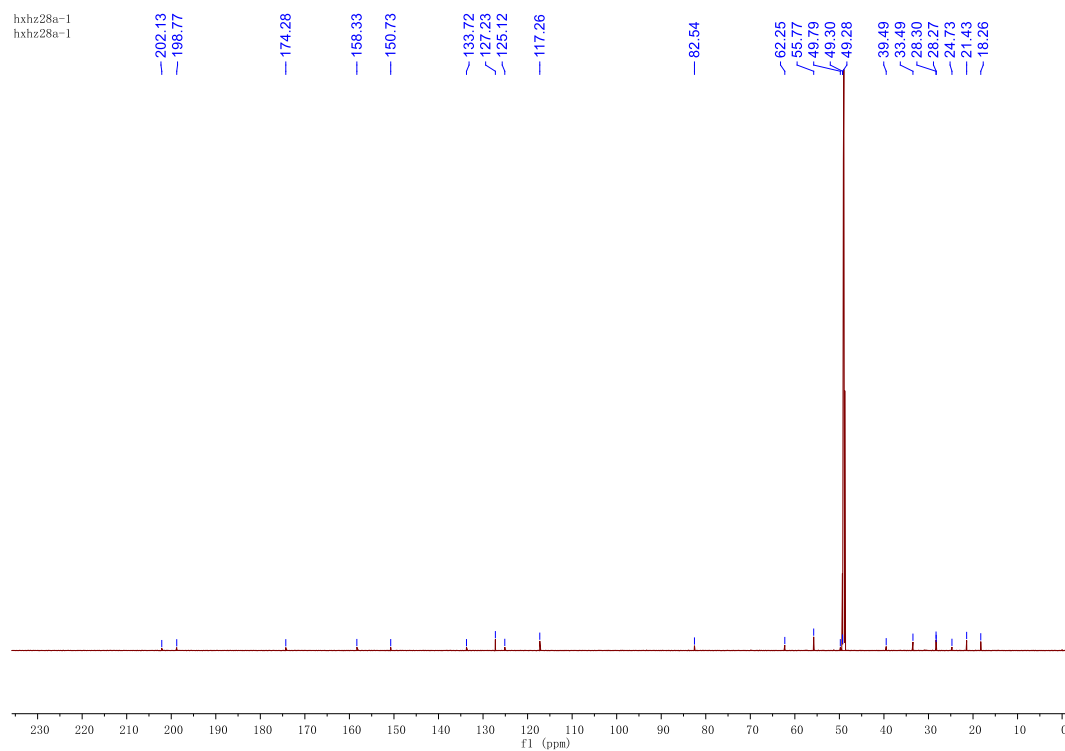

**Figure S26.  $^{13}\text{C}$  NMR spectrum of Perforalactone J (5) in  $\text{CD}_3\text{OD}$ .**

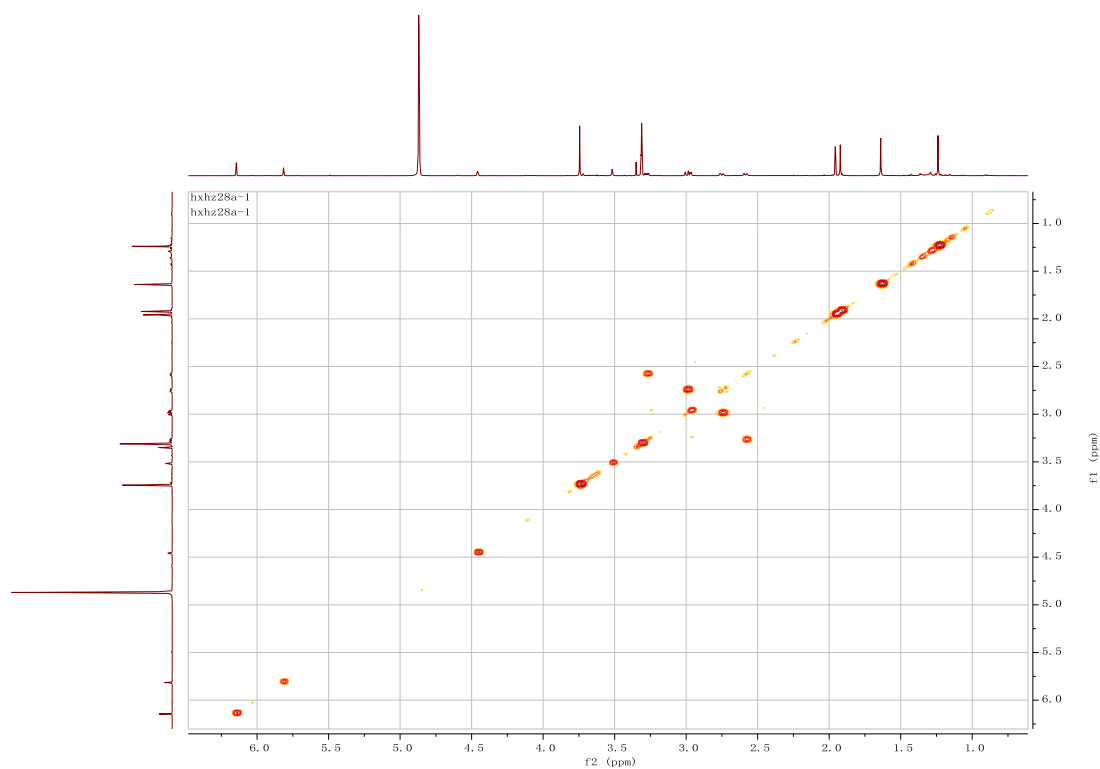

**Figure S27.  $^1\text{H}$ - $^1\text{H}$  COSY spectrum of Perforalactone J (5) in  $\text{CD}_3\text{OD}$ .**

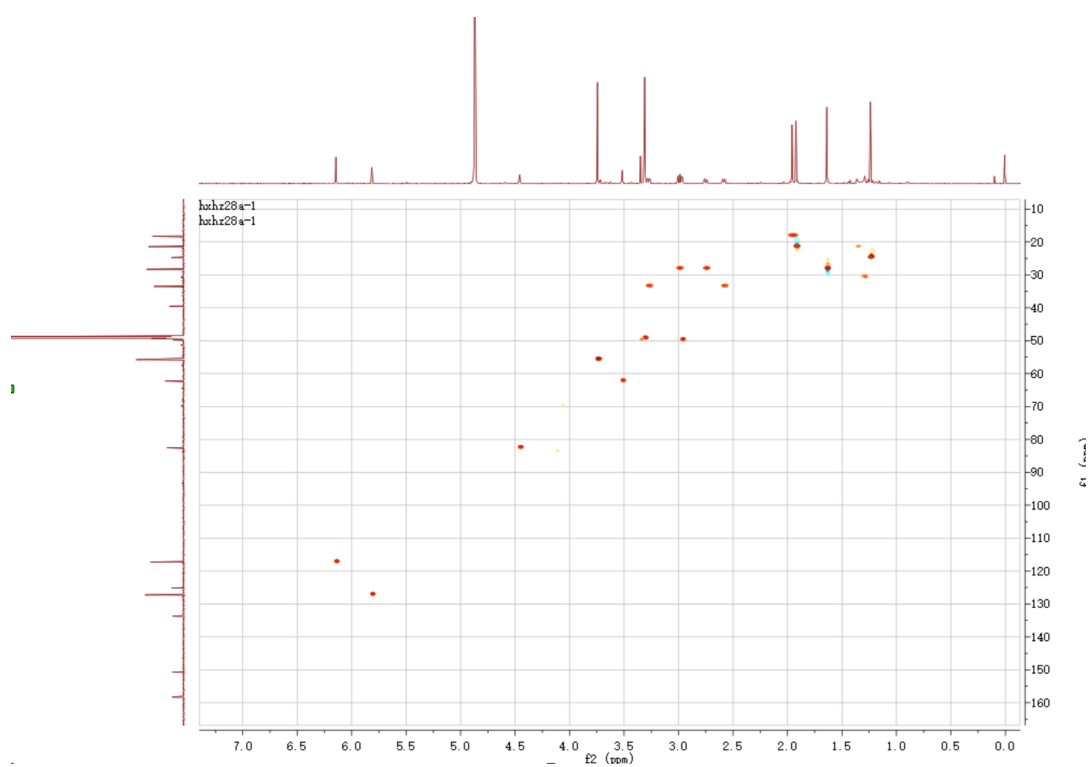

**Figure S28. HSQC spectrum of Perforalactone J (5) in  $\text{CD}_3\text{OD}$ .**

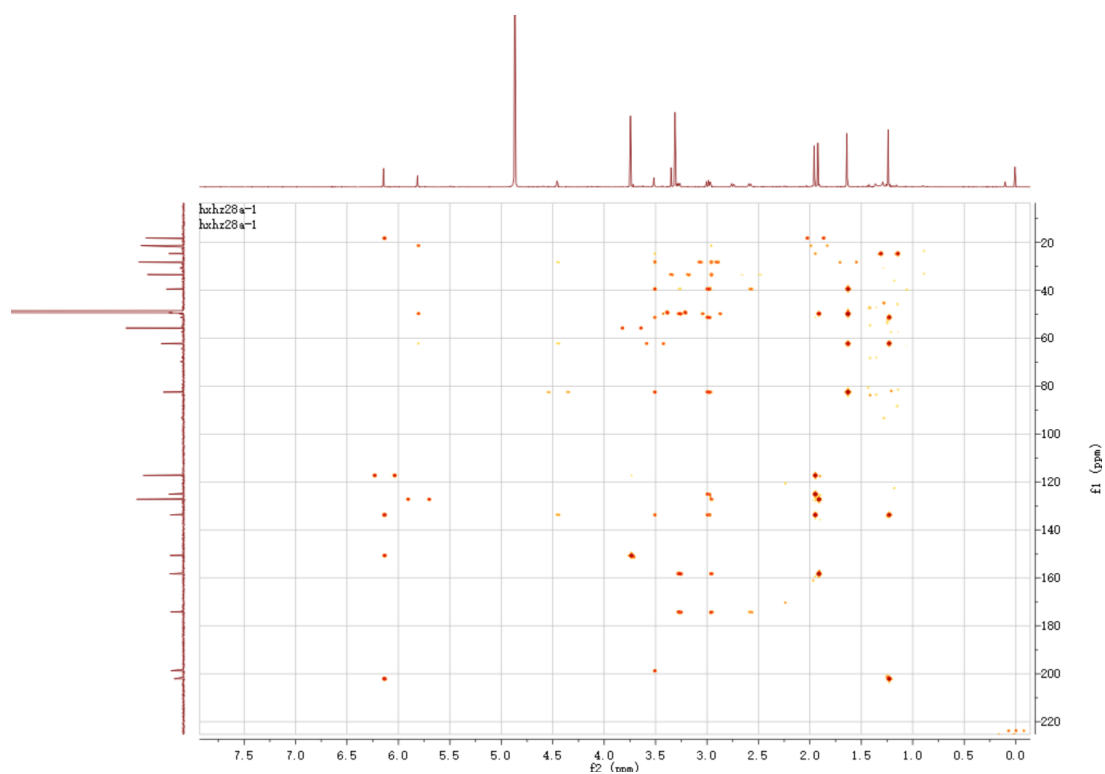

**Figure S29. HMBC spectrum of Perforalactone J (5) in CD<sub>3</sub>OD.**

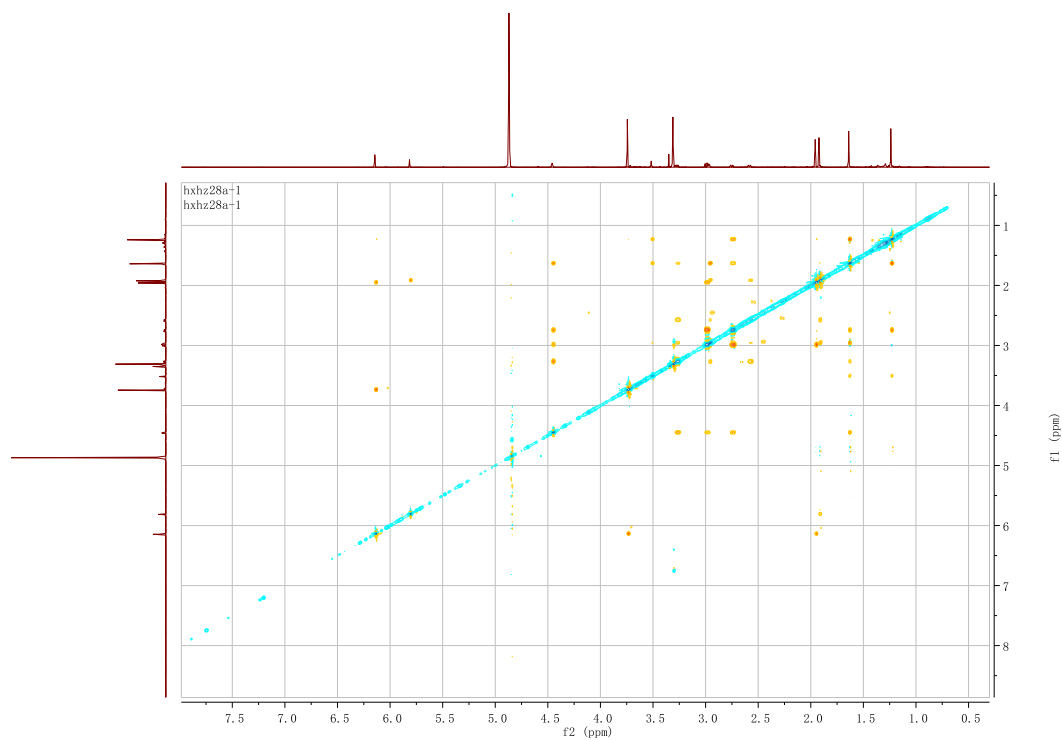

**Figure S30. ROESY spectrum of Perforalactone J (5) in CD<sub>3</sub>OD.**

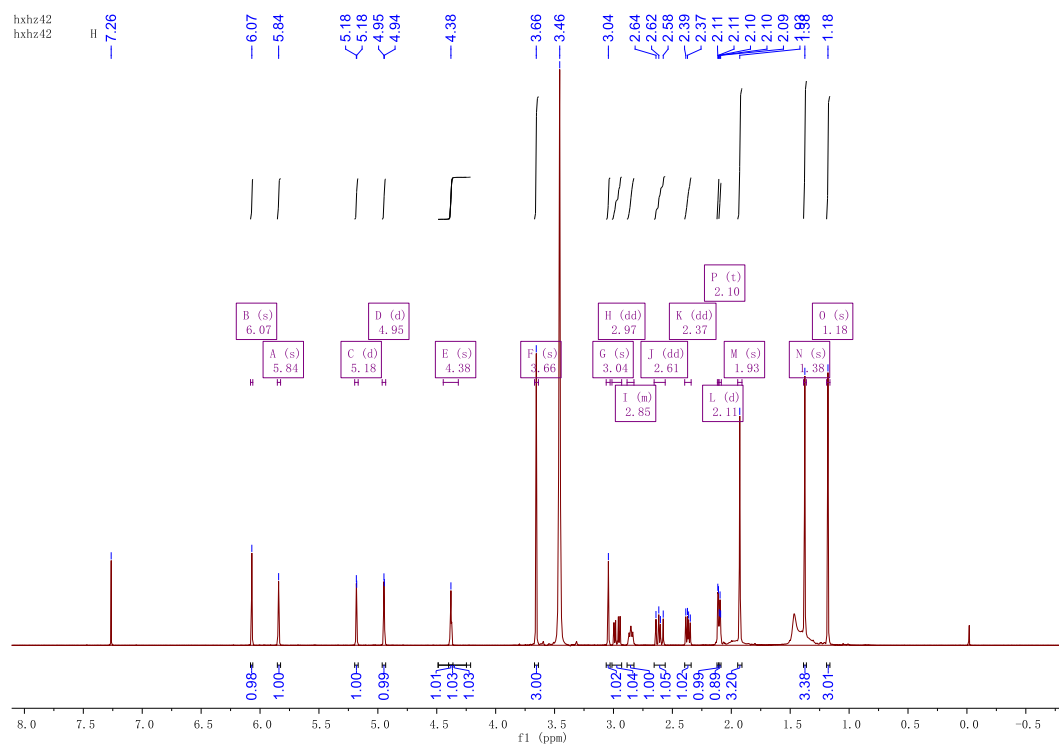

**Figure S31.  $^1\text{H}$  NMR spectrum of Perforalactone K (6) in  $\text{CDCl}_3$ .**

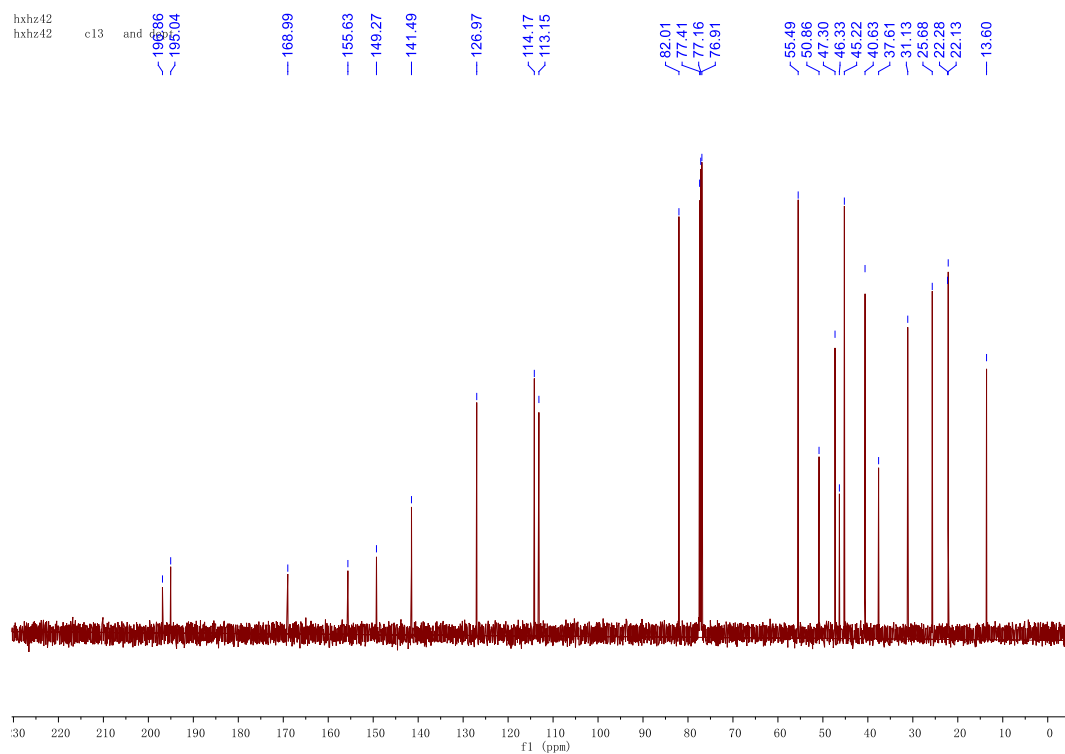

**Figure S32.  $^{13}\text{C}$  NMR spectrum of Perforalactone K (6) in  $\text{CDCl}_3$ .**

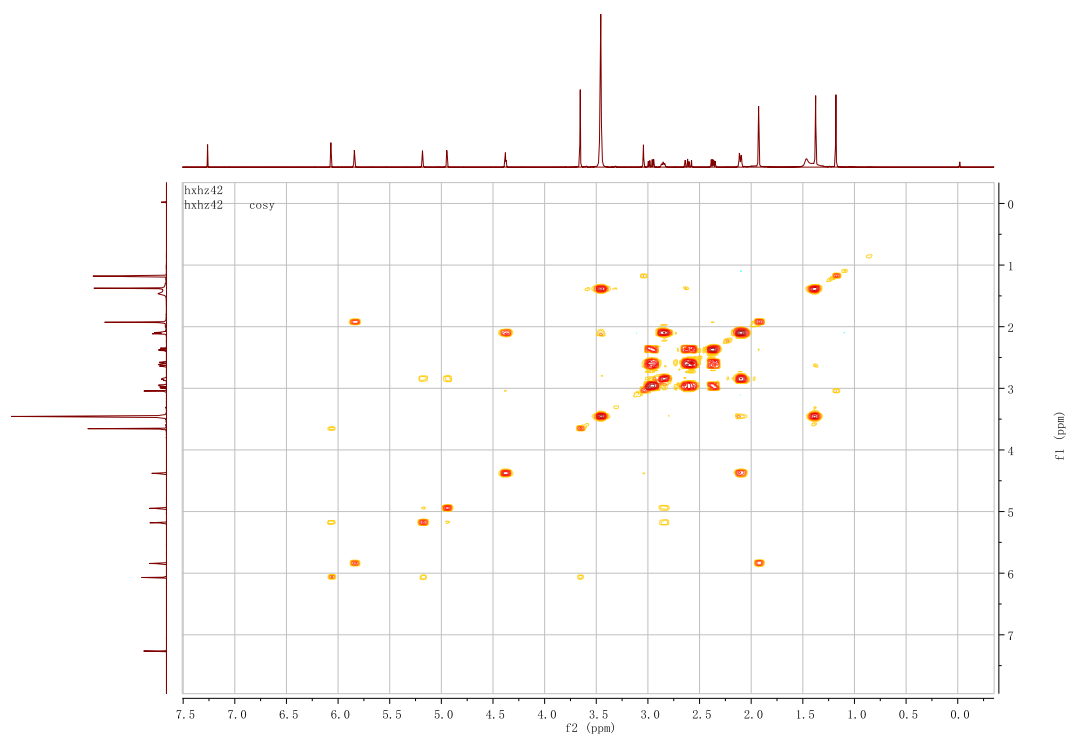

**Figure S33.  $^1\text{H}$ - $^1\text{H}$  COSY spectrum of Perforalactone K (6) in  $\text{CDCl}_3$ .**

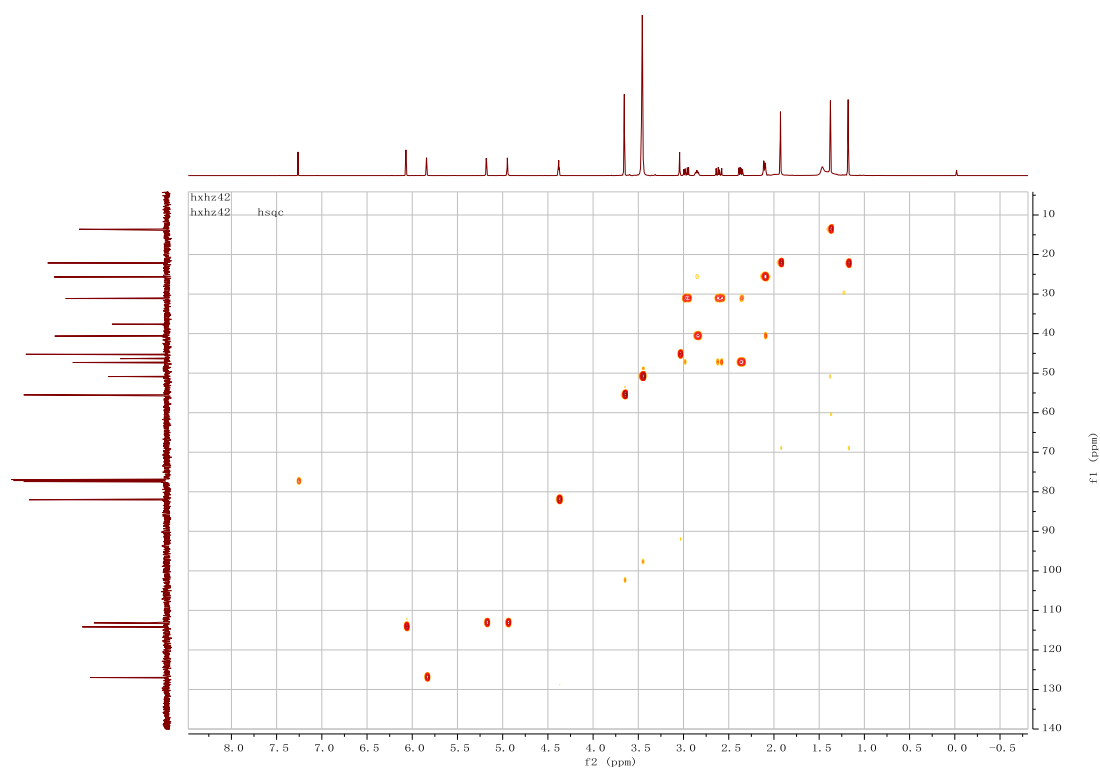

**Figure S34. HSQC spectrum of Perforalactone K (6) in  $\text{CDCl}_3$ .**

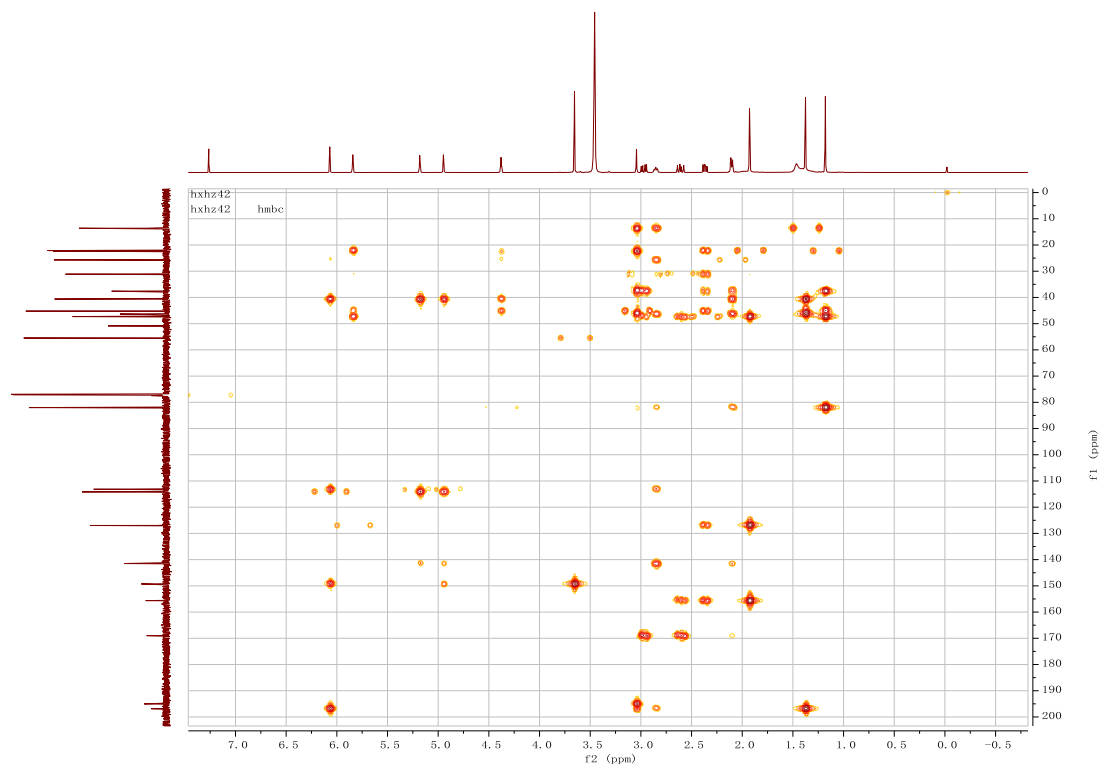

**Figure S35. HMBC spectrum of Perforalactone K (6) in CDCl<sub>3</sub>.**

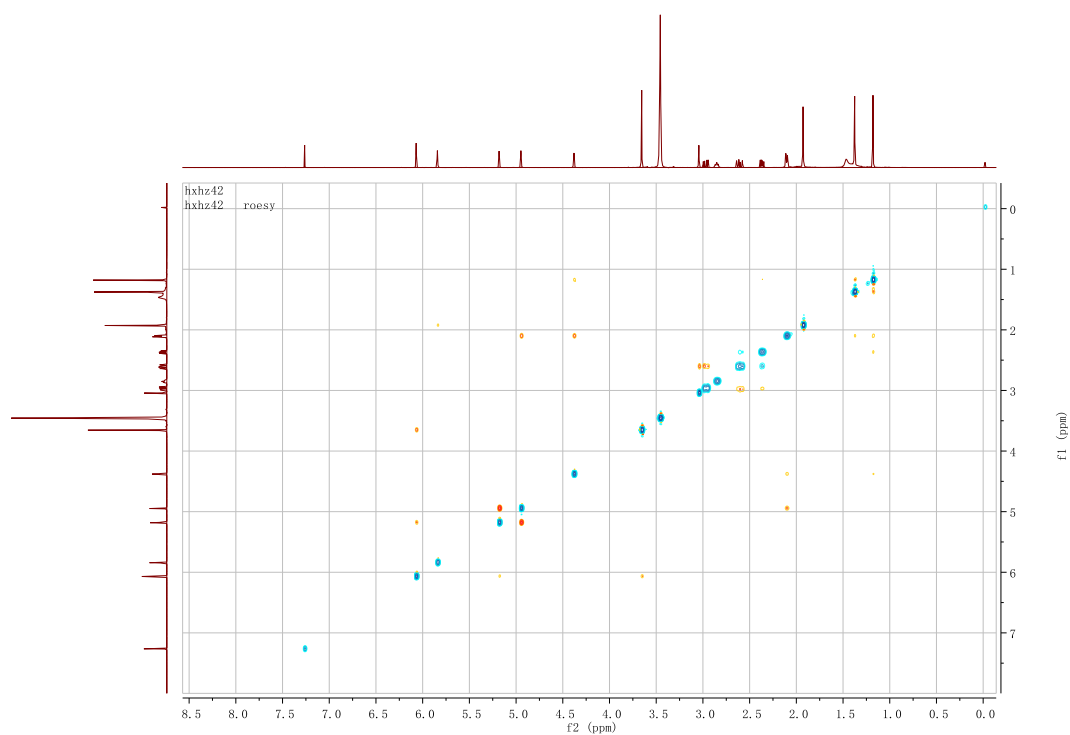

**Figure S36. ROESY spectrum of Perforalactone K (6) in CDCl<sub>3</sub>.**

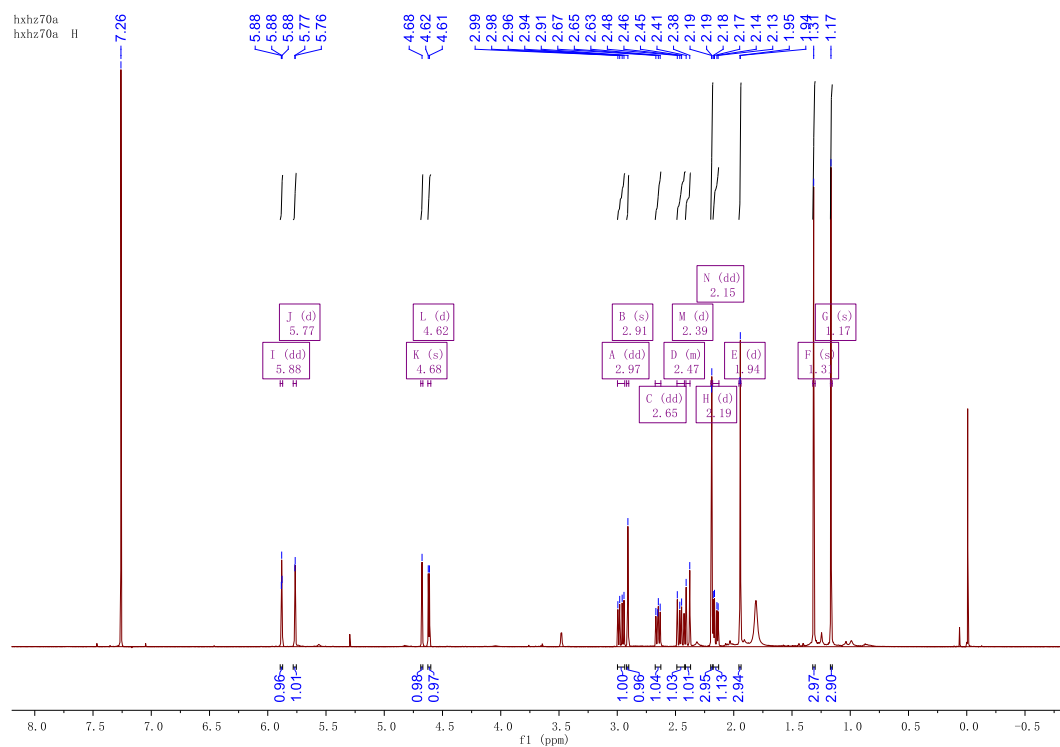

**Figure S37.  $^1\text{H}$  NMR spectrum of Perforalactone L (7) in  $\text{CDCl}_3$ .**

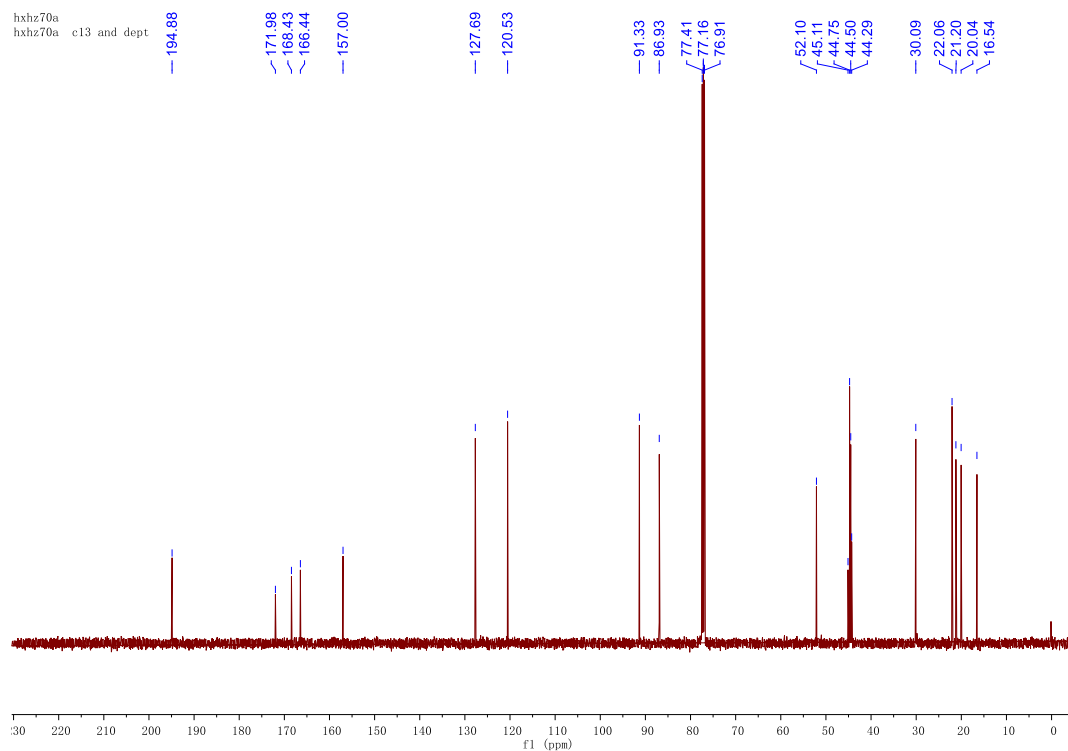

**Figure S38.  $^{13}\text{C}$  NMR spectrum of Perforalactone L (7) in  $\text{CDCl}_3$ .**

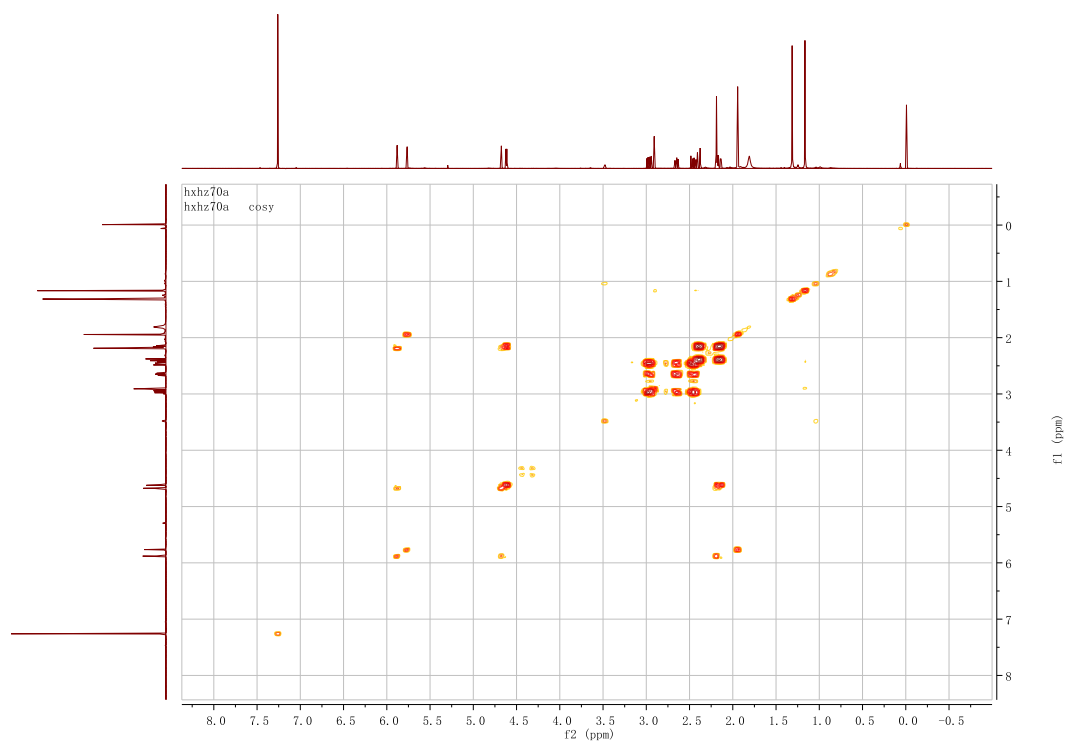

**Figure S39.  $^1\text{H}$ - $^1\text{H}$  COSY spectrum of Perforalactone L (7) in  $\text{CDCl}_3$ .**

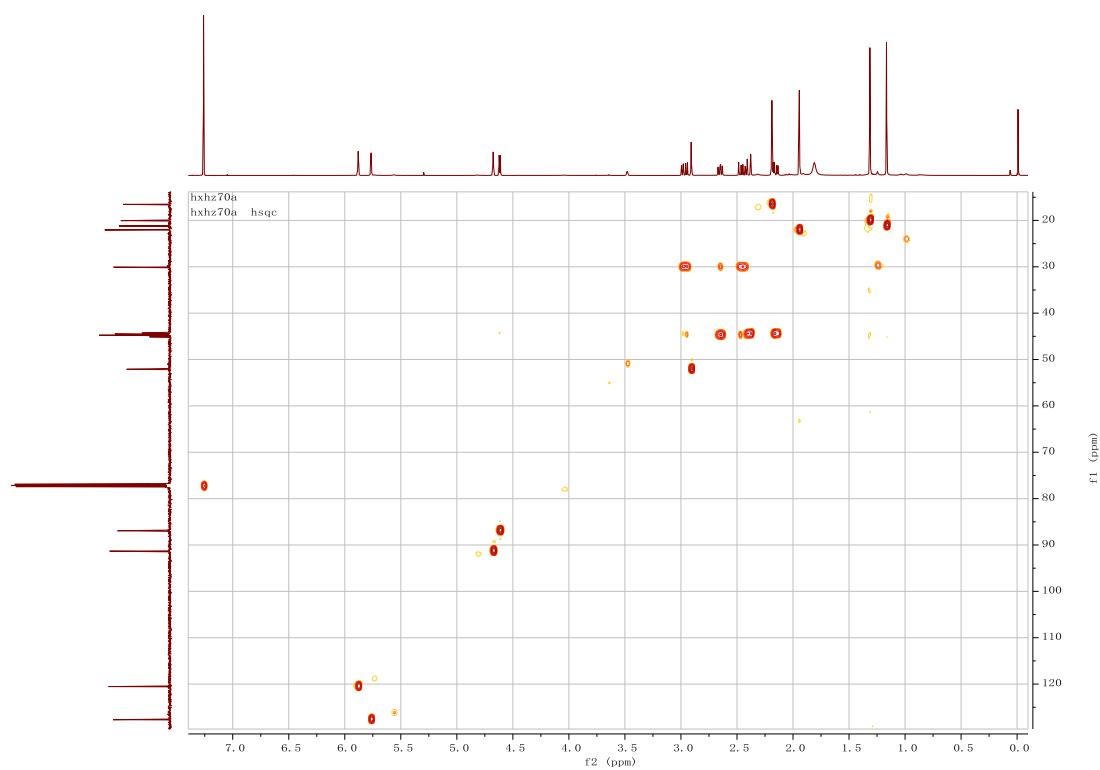

**Figure S40. HSQC spectrum of Perforalactone L (7) in  $\text{CDCl}_3$ .**

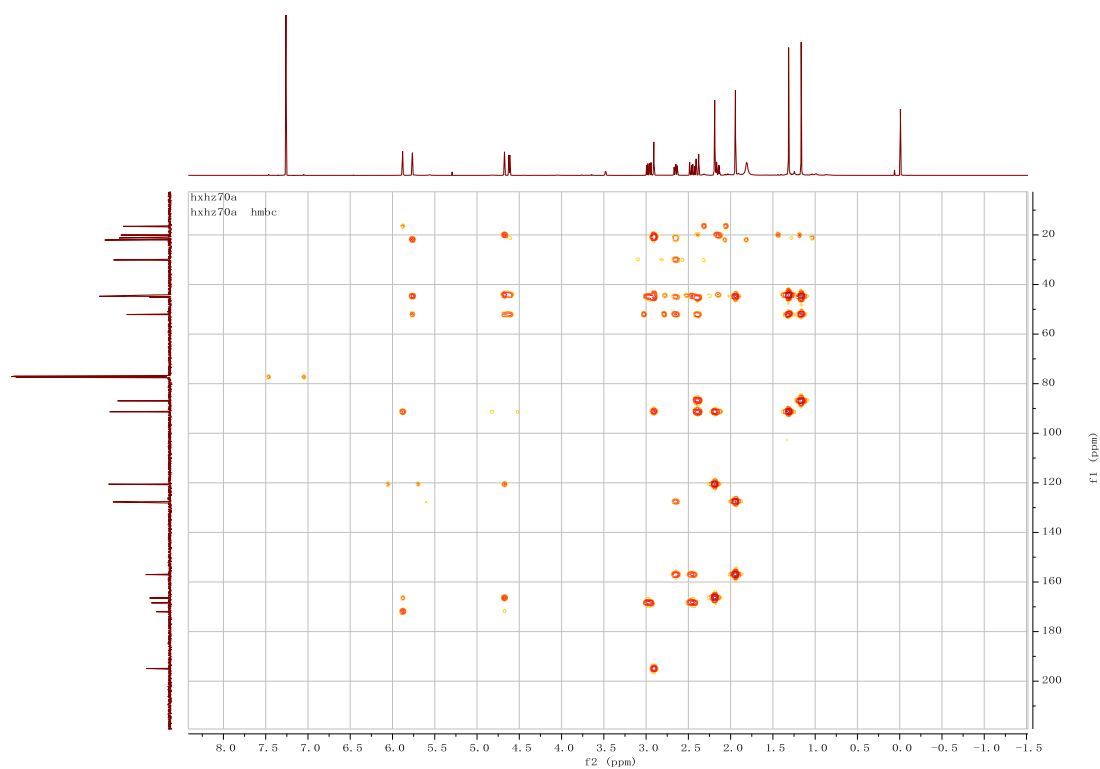

**Figure S41. HMBC spectrum of Perforalactone L (7) in CDCl<sub>3</sub>.**

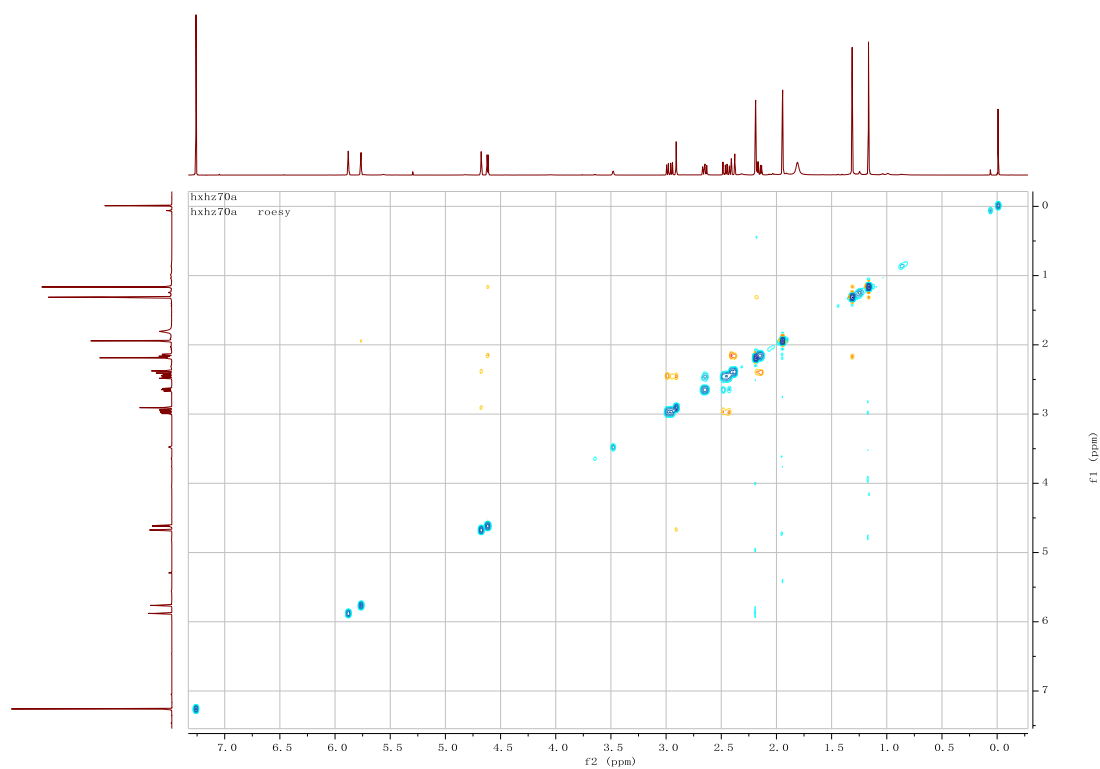

**Figure S42. ROESY spectrum of Perforalactone L (7) in CDCl<sub>3</sub>.**
